# Supplementary material for: A T-Cell Epitope-Based Multi-Epitope Vaccine Designed Using Human HLA Specific T Cell Epitopes Induces a Near-Sterile Immunity against Experimental Visceral Leishmaniasis in Hamsters
Source: MDPI journal article supplement (doi:10.3390/vaccines9101058), 2021-09-23
Supplement: s1 [file s1]

## Supplementary Data

### Epitope identification:

Epitopes predicted from both IEDB tools for respective MHC-I and MHC-II alleles fell in an overlapping pattern. For MHC-I & MHC-II alleles 31 & 53 epitopes were detected in AY-161269, 57 & 44 epitopes were present in AY-180912, and 107 & 52 epitopes in AY-377788 respectively. NETMHC-1 and NETMHC-2 predictions remained similar to IEDB with a majority of epitopes overlapping each other. For AY161269 26 & 149 epitopes were detected as MHC-I and MHC-II specific epitopes respectively. For AY-180912 41 & 267 epitopes and AY-377788 cDNA 107 & 400 epitopes were detected for MHC-I and MHC-II alleles respectively (**Supplementary Figures 1-3, Supplementary Table 1**).

Results obtained from IFNepitope contained 49 epitopes positive for IFN- $\gamma$  induction in AY-161269, 54 epitopes in AY-180912, and 177 epitopes in AY-377788. Out of which based on Propred and Propred1 for AY-377788, 23 epitopes were MHC-I allele-specific and 129 were MHC-II allele-specific. For AY-161269, 4 were MHC-II allele-specific and 31 were MHC-I allele-specific. For AY-180912, 3 were MHC-II allele-specific while 38 were MHC-I allele-specific.

Multiple epitopes were identified for more than one MHC allele. The majority of epitope sequences predicted by both IEDB and NETMHC for MHC-I and MHC-II had sequence similarities and fell in an overlapping pattern forming epitope-rich regions or islands. More than once the epitope/s were both MHC-I and MHC-II binders along with IFN- $\gamma$  inducer/s.

**Selection of epitopes and designing of construct 1:** Construct 1 was designed based on the epitopes predicted as strong binders of respective MHC-I and MHC-II alleles by IEDB and NETMHC-1 and NETMHC-2. Overlaying regions of multiple epitopes were selected to design the construct. The calculated molecular weight of the multiepitope construct was 64458.67 dalton, with a theoretical pI of 6.97. The recombinant construct contained a poly Histidine site (6 $\times$ His) at the N-terminal for identification purposes. The protein contained a total of 593 amino acids with 65 positively charged and 64 negatively charged. The construct contained no Pyrrolysine Pyl (O) and Selenocysteine Sec (U) amino acids while the Tyrosine Try (Y) was present at a single position (0.2%). (**Supplementary Figure 4, Supplementary Table 2 & 3**)

**Selection of epitopes and designing for construct 2:** The second design was based on the results of IFNepitope and Propred1. To generate a stronger CTL response, we selected only those IFN- $\gamma$  epitopes, which were MHC-I or CTL (CD8<sup>+</sup> T cells) binders. A total of 63 epitopes were considered out of which 17 were also MHC-II binders. The multiepitope candidate contained a poly His site at the N terminal for identification purposes. The calculated molecular weight of the protein was 36695.70 dalton. The total number of amino acids was 348 with 36 negatively charged and 38 positively charged. The calculated pI value was 8.35. The least numbered amino acid was Cysteine with 2 (0.6%) molecules while Try, Pyl, and Sec didn't occur at all. (**Supplementary Figure 5, Supplementary Table 2 & 3**)

**Selection of epitopes and designing for construct 3:** Construct 3 was based on the results of IFNepitope, Propred2, and NetChop 3.0. In our attempt to induce only CD4<sup>+</sup>Tcells only those epitopes which were binders of MHC-II were taken with 24 epitopes in total, spanning 9 epitope regions of overlapping epitopes, out of 24 epitopes 7 were also CTL inducers. The candidate protein contained a poly-HIS site at the N terminal for identification purposes. The theoretical calculated molecular weight was 29007.66 dalton with 256 amino acids. With 33 amino acids

charged negative and 38 as positive, the theoretical pI value was 9.1. Out of 256 amino acids, W and O were absent while U and Y were present three times and C presented itself only once. (**Supplementary Figure 6, Supplementary Table 2 & 3**)

### **Molecular cloning and protein isolation:**

For the generation of multi-epitope protein, the three multiepitope sequences were reverse translated into nucleotide sequences of 756 bp, 1026 bp & 1761 bp size. The inserts were obtained in pMAT and pMK-RQ cloning vectors through Gene Art ThermoFisher. One pMA-T plasmid contained 1761 bp insert, while another contained 756 bp insert, while pMK-RQ contained the 1026 bp insert (**Supplementary Figure 7, Supplementary Table 3**). All the insert sequences were designed with the addition of BamHI and HindIII cloning sites at 5' & 3' terminals respectively. The inserts were isolated from cloning vectors for subcloning in expression vector pQE30 (Qiagen, Hilden, Germany) (**Supplementary Figure 8 & 9**), by double digesting the pMAT and pMK-RQ plasmids by restriction enzyme BamHI and HindIII (NEB, Ipswich, USA) for 45 minutes at 37°C in HF buffer system (NEB Ipswich, USA). Additionally, pQE30 was also double digested with the same set of enzymes to generate 5' & 3' sticky ends at the insertion site. The double digested products were separated on 1.5% agarose gel by electrophoresis and staining the DNA with Atlas ClearSight DNA stain (Bioatlas Estonia) (**Supplementary Figures 8 - 10**). Respective bands of 756 base pairs (bp), 1026 bp, and 1761 bp were cut from the gel using sterile surgical blades. The DNA insert was isolated and purified from agarose gel by Monarch® DNA Gel Extraction Kit (NEB, Ipswich, USA) using the manufacture's protocol. The isolated DNA inserts were ligated to pQE30 expression plasmid in a 1:3 vector to insert molar ratio. The ligation was carried overnight at 16°C using T4 ligase (NEB, Ipswich, USA) in the respective buffer system (NEB, Ipswich, USA). The final transformation was carried out in ultracompetent M15 *E. coli* (Qiagen, Hilden, Germany) on ice for 30 minutes. The bacteria were plated on ampicillin and kanamycin LB Agar plates. The plates were placed inverted overnight for colony formation at 37°C. After 12 hrs, the plates were checked for bacterial colonies and random colonies were selected for colony PCR to test transformed bacteria (**Supplementary Figure 11**).

Random colonies were used to amplify the insert sequence of respective size using primers flanking 5' and 3' insert sites in a PCR setup. Post amplification the PCR product were separated on 1% agarose gel stained with EtBr for detection of individual bands of size,  $756+336=1092$  bp,  $1026 + 336 = 1362$  bp &  $1761+336=2097$  bp (336 bp arising as flanking sequences to core sequence) (**Supplementary Figure 12**). Colonies positive for respective insert were further validated by DNA sequencing. The colonies with confirmed cloning were stored as 40% glycerol stock at -80°C for further use.

Protein expression was induced in the bacteria grown from a single transformed colony at 37°C with 0.1mM IPTG. The protein expressed in inclusion bodies was isolated by solubilizing the inclusion bodies in tris buffer (pH 8). Membrane-bound protein was washed by repeatedly washing in a buffer containing Deoxycholic acid and Tris·HCl with EDTA. Finally, the protein was dissolved in 6M Guanidinium HCL. The Guanidinium HCL was removed by overnight dialysis against ddH<sub>2</sub>O. The final product was lyophilized, weighed, and stored at -20°C. The purified product was tested for endotoxin levels using Endotoxin detection kit (THG10-0250, Hi-Media, Mumbai, India), the levels were within an acceptable range i.e., less than 0.25 EU.

The recombinant proteins were confirmed for their molecular weight by 12% SDS-PAGE separation and western blotting using anti-his antibodies. Since the recombinant construct contained a poly Histidine tag at N-terminal, individual bands were visualized by staining with HRP conjugated anti-his antibody (**Supplementary Figure 13 & 14**).

**Supplementary Table 1.** Summary of epitopes predicted by IEDB for MHC-I and II, NETMHC-1, NETMHC-2 & IFNepitope. The number of epitopes predicted with starting amino acid position and last amino acid position in the native sequence. In brackets are the number of epitopes from the sequence.

| <b>B4/1<br/>(AY 161269)</b> | <b>IEDB MHC-I<br/>(number of<br/>epitopes 31)</b>  | <b>NET MHC-I<br/>AY (number<br/>of epitopes<br/>26)</b> | <b>IEDB MHC-II<br/>(number<br/>of epitopes<br/>53)</b> | <b>NET MHC-II<br/>(number<br/>of epitopes<br/>149)</b> | <b>IFNepitope<br/>(number of<br/>epitopes)</b> |
|-----------------------------|----------------------------------------------------|---------------------------------------------------------|--------------------------------------------------------|--------------------------------------------------------|------------------------------------------------|
|                             | aa 1-10 (5)                                        | aa 1-20 (15)                                            | aa 1-88 (53)                                           | aa 1-95(149)                                           | aa 9-110 (49)                                  |
|                             | aa 12-83(26)                                       | aa 35 -58(7)                                            |                                                        |                                                        |                                                |
|                             |                                                    | aa 71-80(4)                                             |                                                        |                                                        |                                                |
|                             |                                                    |                                                         |                                                        |                                                        |                                                |
| <b>F2/1<br/>(AY 180912)</b> | <b>IEDB MHC-I<br/>(number of<br/>epitopes 57)</b>  | <b>NET MHC-I<br/>(number of<br/>epitopes 41)</b>        | <b>IEDB MHC-II<br/>(number<br/>of epitopes<br/>44)</b> | <b>NET MHC-II<br/>(number<br/>of epitopes<br/>267)</b> | <b>IFNepitope<br/>(number of<br/>epitopes)</b> |
|                             | aa 9-200 (57)                                      | aa 11-33 (5)                                            | aa 22-41(9)                                            | aa 21-55(49)                                           | aa 1-222 (54)                                  |
|                             |                                                    | aa 41-64(10)                                            | aa 48-63 (3)                                           | aa 80-115(90)                                          |                                                |
|                             |                                                    | aa 87-96(2)                                             | aa 83-202 (32)                                         | aa 134-205(128)                                        |                                                |
|                             |                                                    | aa 134-164(6)                                           |                                                        |                                                        |                                                |
|                             |                                                    | aa 178-199(10)                                          |                                                        |                                                        |                                                |
|                             |                                                    | aa 212-220(8)                                           |                                                        |                                                        |                                                |
|                             |                                                    |                                                         |                                                        |                                                        |                                                |
| <b>A2/1<br/>(AY 377788)</b> | <b>IEDB MHC-I<br/>(number of<br/>epitopes 107)</b> | <b>NET MHC-I<br/>(number of<br/>epitopes 118)</b>       | <b>IEDB MHC-II<br/>(number<br/>of epitopes<br/>52)</b> | <b>NET MHC-II<br/>(number<br/>of epitopes<br/>400)</b> | <b>IFNepitope<br/>(number of<br/>epitopes)</b> |
|                             | aa 12-19 (1)                                       | aa 14-27(6)                                             | aa 9-45(19)                                            | aa 3-33(61)                                            | aa 7-400 (177)                                 |
|                             | aa 26-47(11)                                       | aa 31-65(6)                                             | aa 154-404(33)                                         | aa 56-74(10)                                           |                                                |
|                             | aa 55-66(2)                                        | aa 78-102(5)                                            |                                                        | aa 84-102(14)                                          |                                                |
|                             | aa 75-91(3)                                        | aa 125-153(5)                                           |                                                        | aa 120-223(177)                                        |                                                |

|                                |                         |                          |                 |                |  |
|--------------------------------|-------------------------|--------------------------|-----------------|----------------|--|
|                                | aa 104-112(1)           | aa 157-166(1)            |                 | aa 250-333(98) |  |
|                                | aa 139-168(18)          | aa 169-178(2)            |                 | aa 342-359(4)  |  |
|                                | aa 170-185(4)           | aa 189-222(33)           |                 | aa 374-408(36) |  |
|                                | aa 190-272(34)          | aa 241-309(18)           |                 |                |  |
|                                | aa 275-308(26)          | aa 342-350(1)            |                 |                |  |
|                                | aa 364-377(5)           | aa 363-402(41)           |                 |                |  |
|                                | aa 383-399(2)           |                          |                 |                |  |
|                                |                         |                          |                 |                |  |
| <b>Additional Servers used</b> | <b>Propred (MHC-II)</b> | <b>Propred-I (MHC-I)</b> | <b>CTLpred</b>  |                |  |
| <b>B4/1 (AY161269)</b>         | aa 36-66 (4)            | aa 12-110 (31)           | aa 37-45 (3)    |                |  |
| <b>F2/1 (AY180912)</b>         | 1-9, 41-54 (3)          | aa 01-222 (38)           | aa 01- 222 (12) |                |  |
| <b>A2/1 (AY377788)</b>         | aa 15- 400 (23)         | aa 15- 400 (129)         | aa 15- 400 (26) |                |  |

**Supplementary Table 2.** Protein and nucleotide sequence of 64 kDa, 36 kDa, and 29 kDa multiepitope constructs.

>Candidate\_1\_64\_kDa

HHHHHHGSMSETLACTYAALMLSDAGLPTSAENIAAAVKAAGVEMRPTLPIIFARFLEKKSVELTMAAA  
AAQAPTAASAPSPAAGAASAAGGKREYEERLVDCLTKYSCVLFVGMNDVRSQQVHDVRRALRGKAEFIM  
GKKTLQAKIVEKGGKRFNDQCEEYNLLSGNTGLIFTNNAVQEITSVLDAHRVKAPARVGAISPCDVVVPAG  
STGMEPTQTSFFQALNIATKIAKGMVEIVTEKKVLSVGDKVDNSTATLLQKLNISPFYYQVNVLSVWDRGV  
LFGGHRKLVFSFIRMIRRSQVENPERAEAVAQMLGEEFGVDPAGSGGLHDTEVDVLEAFKLTALREHERRSG  
VEQDEKFVCFVELLEKKG YFKGVEKGGPYEGLTAEQIKNKGNELMSQAKYKEAIAYYTKAIELQPDNAVFF  
ANRAAAHTHLKDYNNAIIDCERAIINPEYSKSYSRLGTALFYQENYSRAVD AFTGGAEKAKATALSTGGG  
MGGFPGMGGFPEMGGMPDMSQFANMMSNPQFMETAQRMMQNPEFSNLVANMASKGGKLAGIMADVQA  
NGYGAFQKYLGD PDMNLMMKFQNL MFTNKL

>Candidate\_1\_64\_kDa

GGA TCC ATG AGC GCT GAA ACA TTG GCT TGT ACT TAC GCC GCA CTG ATG CTG TCT GAT GCC GGG  
CTT CCG ACA TCA GCC GAG AAC ATT GCC GCG GCT GTA AAA GCTGCG GGC GTT GAA ATG CGT  
CCC ACG CTT CCT ATT ATT TTC GCC CGT TTC CTT GAA AAG AAG TCG GTT GAA ACT TTG ATG GCA  
GCC GCC GCA GCT CAG GCCCA ACA GCA GCT AGT GCT CCA AGC CCT GCC GCC GGT GCT GCC TCT  
GCG GCA GGT GGA AAA CGC GAG TAC GAG GAG CGT CTT GTA GAT TGC TTA ACT AAATAT AGC  
TGC GTT CTG TTT GTT GGG ATG GAC AAC GTG CGC AGT CAA CAA GTG CAC GAT GTT CGT CGC GCA  
CTG CGT GGC AAG GCT GAG TTC ATT ATG GGGAAA AAG ACC TTA CAA GCA AAA ATT GTT GAA  
AAA GGG GGA AAA CGC TTC AAC GAT CAG TGC GAA GAA TAC AAC CTG TTG TCC GGA AAC ACC  
GGT TTA ATTTT ACC AAT AAT GCA GTT CAG GAA ATT ACC AGC GTC TTA GAT GCT CAC CGC GTC  
AAA GCT CCC GCC CGC GTG GGA GCG ATT TCT CCT TGT GAT GTA GTAGTC CCT GCG GGT AGC ACG  
GGG ATG GAG CCT ACC CAA ACA TCC TTT TTC CAA GCC TTG AAT ATT GCG ACT AAG ATT GCG AAA  
GGC ATG GTA GAA ATC GTGACA GAG AAG AAG GTG CTT AGC GTC GGA GAT AAA GTA GAC AAT  
TCG ACA GCA ACG TTG TTG CAG AAG TTG AAT ATT TCC CCC TTT TAC TAC CAA GTG AACGTT CTG  
TCG GTC TGG GAC CGC GGT GTG TTG TTC GGA GGC CAC CGC AAA TTA GTC TTT AGT TTT ATT CGC  
ATG ATC CGC CGC AGC CAA GTG GAG AAC CCGGAG CGC GCT GAG GCG GTC GCA CAG ATG CTT  
GGG GAG GAA TTT GGC GTC GAT CCT GCG GGA AGT GGG GGC TTG CAT GAC ACT GAG GTT GAT  
GTG CTT GAGGCC TTT AAA ACG GCG CTG CGC GAG CAT GAA CGC CGC TCA GGA GTT GAA CAG  
GAC GAG AAG TTC GTC TGT TTT GTG GAG TTA CTT GAA AAG AAG GGA TATTTC AAG GGG GTA  
GAA AAG GGC GGG CCG TAT GAG GGG TTA ACA GCG GAA CAA ATC AAG AAC AAA GGC AAT GAA  
CTG ATG TCG CAA GCC AAG TAC AAA GAGGCC ATC GCT TAT TAT ACG AAG GCA ATC GAG TTA  
CAG CCT GAC AAT GCG GTT TTC TTT GCG AAC CGT GCA GCT GCA CAC ACA CAC TTA AAG GAT  
TAC AATAAC GCT ATT ATT GAT TGC GAG CGT GCT ATC ATC ATC AAC CCC GAA TAT AGT AAA TCC  
TAT AGC CGC TTG GGG ACC GCT TTG TTT TAT CAG GAA AAC TACTCA CGC GCG GTC GAC GCC TTT  
ACT GGA GGT GCG GAG GAA AAA GCT AAG GCC ACA GCA TTG AGC ACT GGC GGT GGT ATG GGC  
GGA TTT CCT GGG ATG GGAGGA TTC CCA GAA ATG GGG GGA ATG CCC GAT ATG TCG CAA TTC  
GCA AAT ATG ATG TCG AAC CCA CAA TTC ATG GAG ACG GCA CAG CGT ATG ATG CAA AATCCT  
GAG TTT AGC AAC CTT GTA GCT AAT ATG GCG AGC AAA GGT GGT AAG TTG GCA GGA ATC ATG  
GCG GAC GTG CAA GCA AAC GGC TAC GGA GCA TTT CAGAAG TAC CTG GGC GAC CCG GAC GTT  
ATG AAT TTA ATG ATG AAG TTC CAG AAC TTA ATG TTC ACC AAC AAG CTT

>Candidate\_2\_36\_kDa

HHHHHHGSVRRALRGKAEFIMGKKTLLGGNISPFYYQVNVGGS AENIAAAVKAAGVEMRPTLPPIIFAR  
FLEKGG AASAPSPAAGAASAAAAGGKVGGEEDDDMGFGLGGKLVFSFIRMIRRSQVGGVDPAGSG  
GLHDTEVDVLEAFKTALGGQDEKFVCFVELLEKGGFKGVEKGSDEYAQRLEKAREKFGGNELMSQA  
KYKEAIAIYYTKAIELQPDNAVFFANRAAAHHLGGIIDCERAIINPEYSKSYSRLGTALFYQENYSRA  
VDAFTKAGGAEEKAKATALSTGGGMGGFPGMGGFPEMGGMPDMSQFANMMSGGVQANGYGAFQ  
KYLGGGLMMKFQNLML

>Candidate\_2\_36\_kDa

GGA TCC GTG CGC CGT GCG TTA CGT GGT AAG GCT GAA TTT ATC ATG GGT AAG AAG ACA CTG GGG  
GGA AAT ATC AGT CCG TTT TAC TAT CAA GTG AAT GTG GGT GGTCTT GCC GAG AAC ATT GCA GCA GCG  
GTC AAA GCC GCC GGC GTT GAG ATG CGC CCC ACG TTA CCC ATC ATC TTC GCA CGT TTT CTT GAG AAG  
GGC GGC GCAGCC TCC GCT CCG TCA CCA GCA GCC GGA GCG GCC AGC GCT GCG GCA GCA GGT GGA  
AAG GTC GGC GGT GAG GAG GGC GAC GAT GAT ATG GGC TTC GGC TTAGGG GGA AAA TTG GTG TTC  
TCA TTC ATT CGC ATG ATT CGC CGT TCT CAA GTG GGT GGC GTG GAC CCA GCG GGC TCG GGG GGA TTA  
CAT GAC ACG GAA GTGGAC GTG TTA GAA GCG TTT AAG ACG GCA CTG GGC GGC CAG GAC  
GAA AAG TTT GTC TGT TTT GTA GAG CTG TTG GAA AAA GGT GGT TTT AAA GGA GTA GAAAAA  
GGG TCT GAT GAG TAT GCC CAG CGT CTT GAG AAG GCT CGC GAA AAG TTC GGC GGG AAT  
GAG CTG ATG TCT CAA GCA AAG TAC AAG GAA GCG ATC GCCTAC TAC ACA AAA GCG ATC  
GAA TTA CAA CCG GAC AAT GCA GTC TTT TTT GCT AAC CGC GCA GCG GCC CAT ACA CAT  
TTA GGC GGT ATC ATC GAT TGT GAACGT GCG ATT ATT ATT AAT CCT GAA TAT TCC AAA TCC  
TAT TCG CGC TTA GGG ACT GCG CTT TTC TAT CAG GAG AAT TAT TCT CGT GCT GTA GAT GCT  
TTTACT AAG GCA GGC GGA GCA GAG GAA AAA GCT AAA GCG ACC GCT CTG TCC ACC GGG  
GGC GGT ATG GGC GGA TTC CCT GGT ATG GGA GGA TTT CCT GAG ATGGGA GGT ATG CCA  
GAT ATG TCG CAG TTC GCT AAC ATG ATG TCT GGT GGA GTC CAA GCG AAT GGT TAT GGA  
GCC TTC CAA AAA TAT CTG GGT GGA GGA TTGATG ATG AAA TTT CAG AAT TTG ATG AAG CTT

>Candidate\_3\_29\_kDa

HHHHHHGSMEERDLPTDDHRKLVFSFIRMIRRSQVENPVDVLEAFKTALREHERRSGVEQDEKFVCF  
VELLEKKGYFKGVEKGSDEYAVFFANRAAAHHLKKEDLKRAEEKAKATALSTGGGMGGFPGMGGF  
PEMGGMPDMSQMMSNPQFMETAQRMMQNPEFSNLVAVMNLMMKFQNLMTNMPISITAKREYEV  
HDVRRALRGKAEFIMGKKAVKAAGVEMRPTLPIIFARFLEKKSVELTMAAAAAAQAPTAKL

>Candidate\_3\_29\_kDa

GGATCCATGGAAGAACGTGATCTGCCGATTACAGATGATCACCGTAAACTGGTGTCTTAGCTTTATT  
CGTATGATTCGTCGTAGCCAGGTTGAAAATCCGGTTGATGTTCTGGAAGCATTTAAAACCGCACTG  
CGTGAACATGAACGTCGTAGCGGTGTTGAACAGGATGAAAAATTTGTTTGCTTTGTGCAACTGCTG  
GAAAAAAAAGGCTATTTCAAAGGTGTGGAAGGCAAGTGAATATGCCGTTTTTTTTTGCAAA  
TCGTGCAGCAGCACATACCCACCTGAAAAAAGAAGATCTGAAACGCGCAGAAGAAAAAGCAAAA  
GCAACCGCACTGAGCACCGGTGGTGGTATGGGTGGCTTTCCGGGTATGGGAGGTTTTCCGGAAAT  
GGGTGGTATGCCGGATATGAGCCAGATGATGAGCAATCCGCAGTTTATGGAACCGCACAGCGTA  
TGATGCAGAATCCGGAATTTTCAAATCTGGTTGCCGTTATGAACCTGATGATGAAATTTCAGAACC  
TGATGTTTACCAACATGCCGAGCATTACCACCGCAAAACGTGAATATGAAGTTCATGATGTTTCGTC  
GTGCACTGCGTGGTAAAGCAGAATTCATTATGGGTAAAAAAGCCGTTAAAGCAGCCGGTGTGAA  
ATGCGTCCGACCCTGCCGATTATCTTTCACGTTTTCTCGAGAAAAAAGCGTTGAAACCCTGATG  
GCAGCAGCAGCAGCCAGGCACCGACCGCAAAGCTT

**Supplementary Table 3.** Nucleotide Base pair size of inserts and respective final clones.

| <b>Multiepitope Construct</b> | <b>Nucleotide size (base pair)</b> | <b>Cloning vector Size (base pair)</b> | <b>Fragment + pQE30 (base pair)</b> |
|-------------------------------|------------------------------------|----------------------------------------|-------------------------------------|
| 29 kDa                        | 756                                | 3130                                   | 4175                                |
| 36 kDa                        | 1026                               | 3304                                   | 4445                                |
| 64 kDa                        | 1761                               | 4135                                   | 5180                                |

**Supplementary Table 4.** Immunization scheme of hamsters. CFA: Complete Freund's Adjuvant. iFA: Incomplete Freund's Adjuvant. PBS: Phosphate Buffer Saline.

| <b>Groups (n=8)</b> | <b>Day 1</b> | <b>Day 14</b> | <b>Day 28</b> | <b>Day 42</b>                  | <b>Day 102</b> |
|---------------------|--------------|---------------|---------------|--------------------------------|----------------|
| <b>64 kDa</b>       | rAg+CFA      | rAg+iFA       | rAg+PBS       | $1 \times 10^7$<br>amastigotes | sacrifice      |
| <b>36 kDa</b>       | rAg+CFA      | rAg+iFA       | rAg+PBS       | $1 \times 10^7$<br>amastigotes | sacrifice      |
| <b>29 kDa</b>       | rAg+CFA      | rAg+iFA       | rAg+PBS       | $1 \times 10^7$<br>amastigotes | sacrifice      |

|                         |     |     |     |                             |           |
|-------------------------|-----|-----|-----|-----------------------------|-----------|
| <b>Adjuvant control</b> | CFA | iFA | PBS | $1 \times 10^7$ amastigotes | sacrifice |
| <b>Positive control</b> | PBS | PBS | PBS | $1 \times 10^7$ amastigotes | sacrifice |
| <b>Negative control</b> | PBS | PBS | PBS | PBS                         | sacrifice |

**Supplementary Table 5.** Parasite loads and splenic index from the spleen of infected and immunized animals.

| Group (n=8)                  | Mean LDU (Amount of amastigotes/Number of Nucleated cells) $\times$ Weight of organ(mg)). Mean values $\pm$ SEM | Mean Splenic Index                                                                                                          |
|------------------------------|-----------------------------------------------------------------------------------------------------------------|-----------------------------------------------------------------------------------------------------------------------------|
|                              |                                                                                                                 | Splenic Index is measured as the ratio of spleen weight to whole body weight multiplied by a hundred. Mean values $\pm$ SEM |
| <b>Unimmunized-Infected</b>  | 4277.3 $\pm$ 661.1                                                                                              | 0.322 $\pm$ 0.0567                                                                                                          |
| <b>CFA only</b>              | 4602.6 $\pm$ 931.02 ns ( $p > 0.9999$ )                                                                         | 0.368 $\pm$ 0.0534 ns ( $p = 0.3402$ )                                                                                      |
| <b>Immunized with 64 kDa</b> | 178.71 $\pm$ 47.03*** ( $p = 0.0002$ )                                                                          | 0.145 $\pm$ 0.048** ( $p = 0.0050$ )                                                                                        |
| <b>Immunized with 36 kDa</b> | 332.2 $\pm$ 105.32*** ( $p = 0.0002$ )                                                                          | 0.216 $\pm$ 0.067* ( $p = 0.0303$ )                                                                                         |
| <b>Immunized with 29 kDa</b> | 478.5 $\pm$ 50.10*** ( $p = 0.0002$ )                                                                           | 0.151 $\pm$ 0.013** ( $p = 0.0012$ )                                                                                        |
| <b>Healthy</b>               | NA                                                                                                              | 0.168 $\pm$ 0.0548                                                                                                          |

Significant difference determined by Student's t-test, \*  $p < 0.05$  compared to unimmunized-infected group. Level of significance, n.s.  $p > 0.05$ , \*  $p \leq 0.05$ , \*\*  $p \leq 0.01$ , \*\*\*  $p \leq 0.001$

**Supplementary Table 6.** Splenic culture assays for promastigote detection. n=8. Mean count  $\pm$ SD. The difference between groups was statistically significant at  $p < 0.0001$  as determined by ANOVA. \*Dunnnett's multiple comparisons test, (Level of significance, ns  $p > 0.05$ , \*  $p \leq 0.05$ , \*\*  $p \leq 0.01$ , \*\*\*  $p \leq 0.001$ , \*\*\*\*  $p \leq 0.0001$ )

|           | Infected            | CFA only              | 64 kDa                | 36 kDa                  | 29 kDa                  |
|-----------|---------------------|-----------------------|-----------------------|-------------------------|-------------------------|
| <b>0</b>  | 11.11 $\pm$ 26.67   | 8.89 $\pm$ 14.53      | 0 $\pm$ 0             | 0 $\pm$ 0               | 0 $\pm$ 0               |
| <b>5</b>  | 184.44 $\pm$ 120.4  | 104.44 $\pm$ 74.68    | 0 $\pm$ 0             | 2.22 $\pm$ 6.67         | 0.11 $\pm$ 0.33         |
| <b>7</b>  | 602.22 $\pm$ 432.60 | 395.56 $\pm$ 269.23   | 8.89 $\pm$ 14.53****  | 57.78 $\pm$ 104.137**** | 104.44 $\pm$ 253.77**** |
| <b>14</b> | 1162.22 $\pm$ 385.8 | 884.44 $\pm$ 304.27** | 26.66 $\pm$ 56.57**** | 151.11 $\pm$ 159.72**** | 226.67 $\pm$ 253.77**** |

**Supplementary Table 7.** List of Immune-response Genes selected for Quantitative RT-PCR analysis.

| Gene              | 5'-3' sequence                     | amplicon size |
|-------------------|------------------------------------|---------------|
| $\gamma$ -actin F | ACA GAG AGA AGA TGA CGC AGA TAA TG | 70 bp         |
| $\gamma$ -actin R | GCC TGA ATG GCC ACG TAC A          |               |
|                   |                                    |               |
| IL-10 F           | GGT TGC CAA ACC TTA TCA GAA ATG    | 194 bp        |
| IL-10 R           | TTC ACC TGT TCC ACA GCC TTG        |               |
|                   |                                    |               |
| IL-4              | ACA GAA AAA GGG ACA CCA TGC A      | 95 bp         |
| IL-4 R            | GAA GCC CTG CAG ATG AGG TCT        |               |
|                   |                                    |               |
| IFN- $\gamma$ F   | TGT TGC TCT GCC TCA CTC AGG        | 130 bp        |
| IFN- $\gamma$ R   | AAG ACG AGG TCC CCT CCA TTC        |               |
|                   |                                    |               |
| CCR7 F            | TTGGCAGAAGCACACCTGAT               | 107 bp        |
| CCR7 R            | CAAATCCGTGATGGAACCGC               |               |
|                   |                                    |               |
| TGF- $\beta$ 1 F  | GGC TAC CAC GCC AAC TTC TG         | 81 bp         |
| TGF- $\beta$ 1 R  | GAG GGC AAG GAC CTT ACT GTA CTG    |               |
|                   |                                    |               |
| TBE21 F           | ACCGGGACCCAATTGTCAAC               | 96 bp         |
| TBE21 R           | GGAAGGTCGGGGTAGAAACG               |               |
|                   |                                    |               |
| TNF- $\alpha$ F   | TGA GCC ATC GTG CCA ATG            | 79 bp         |
| TNF- $\alpha$ R   | AGC CCG TCT GCT GGT ATC AC         |               |
|                   |                                    |               |
| IL-12p40 F        | AAT GCG AGG CAG CAA ATT ACT C      | 88 bp         |
| IL-12p40 R        | CTG CTC TTG ACG TTG AAC TTC AAG    |               |
|                   |                                    |               |
| L Sell F          | GGTTCACGTTAGGCAGACCT               | 129 bp        |
| L Sell R          | GGCTCCTGGAAGACAATGGAA              |               |
|                   |                                    |               |
|                   |                                    |               |
| CXCR-3 F          | TGTTCA GTGGGTTTTTCGGCT             | 136 bp        |
| CXCR-3 R          | GATCTGGGTGGCATGCACTA               |               |
|                   |                                    |               |
| IL-21 F           | GGACAGTGGCCCATAAAACAAG             | 80 bp         |
| IL-21 R           | TTCAACACTGTCTATAAGATGACGAAGTC      |               |
|                   |                                    |               |
| CXCL-9 F          | AATTCTGTTGGTGGAGGCGT               | 84 bp         |
| CXCL-9 R          | TCACCGGACCTCCTCTTCTC               |               |

|         |                       |        |
|---------|-----------------------|--------|
|         |                       |        |
| CD274 F | TTGCTAAATGCCCCATACCGA | 70 bp  |
| CD274 R | GTTTCATGCTCGGACGTGACT |        |
|         |                       |        |
| IL23r F | TTTGGGGAACCTCATGCCTC  | 119 bp |
| IL23r R | ACTTTGCTGGGGACATCTGG  |        |
|         |                       |        |

**Supplementary Table 8.** Parasite clearance at different time intervals from adherent peritoneal cells of immunized and unimmunized hamsters. Relative fold change in levels of ROS production in peritoneal cells from immunized and unimmunized hamsters. For Parasite clearance, the significant difference was determined by Student's t-test between the healthy group and the test group. For RPI significant difference determined by Student's t-test between immunized vs unimmunized-infected group (Level of significance, ns  $p>0.05$ , \* $p\leq 0.05$ , \*\* $p\leq 0.01$ , \*\*\* $p\leq 0.001$ ).

|             | Parasite Clearance, measured as MFI value of CFSE signal intensity from Macrophages. Mean values $\pm$ SEM |                                    |                                     | ROS levels as measured by MFI value of DCF signal intensity from Macrophages. Values expressed a ROS Production Index. RPI= (MFI test group/MFI healthy group) Mean RPI values $\pm$ SEM |                                                |
|-------------|------------------------------------------------------------------------------------------------------------|------------------------------------|-------------------------------------|------------------------------------------------------------------------------------------------------------------------------------------------------------------------------------------|------------------------------------------------|
| Group (n=8) | Mean MFI at 12 hrs                                                                                         | Mean MFI at 24 hr                  | Mean MFI at 48 hr                   | 12 hrs Mean relative fold change in ROS levels                                                                                                                                           | 24 hrs Mean relative fold change in ROS levels |
| Infected    | 55.33 $\pm$ 3.9                                                                                            | 59.7 $\pm$ 8.2                     | 33.48 $\pm$ 12.02                   | 0.54 $\pm$ 0.081                                                                                                                                                                         | 0.31 $\pm$ 0.09                                |
| CFA         | 42.2 $\pm$ 4.79 * ( $p=0.049$ )                                                                            | 86.86 $\pm$ 7.05                   | 36.27 $\pm$ 8.7                     | 0.68 $\pm$ 0.302                                                                                                                                                                         | 0.52 $\pm$ 0.10                                |
| 64 kDa      | 19.26 $\pm$ 1.46 *** ( $p=0.0002$ )                                                                        | 8.14 $\pm$ 0.96 *** ( $p=0.0002$ ) | 10.58 $\pm$ 2.39 *** ( $p=0.0002$ ) | 2.24 $\pm$ 1.12 *** ( $p=0.0011$ )                                                                                                                                                       | 1.23 $\pm$ 0.68 * ( $p=0.0281$ )               |
| 36 kDa      | 16.39 $\pm$ 2.16 *** ( $p=0.0002$ )                                                                        | 27.6 $\pm$ 5.9 * ( $p=0.0193$ )    | 6.41 $\pm$ 1.63 *** ( $p=0.0002$ )  | 2.33 $\pm$ 0.8                                                                                                                                                                           | 1.11 $\pm$ 0.32 ** ( $p=0.0019$ )              |
| 29 kDa      | 26.18 $\pm$ 2.0 *** ( $p=0.0002$ )                                                                         | 17.7 $\pm$ 1.59 ** ( $p=0.0011$ )  | 14.36 $\pm$ 1.80 *** ( $p=0.0002$ ) | 4.44 $\pm$ 1.92                                                                                                                                                                          | 0.93 $\pm$ 0.31 * ( $p=0.0148$ )               |

|                |           |            |             |    |    |
|----------------|-----------|------------|-------------|----|----|
| <b>Healthy</b> | 68.5 ±3.2 | 68.63 ±5.2 | 41.14 ±5.93 | NA | NA |
|----------------|-----------|------------|-------------|----|----|

**Supplementary Table 9.** Mean frequency of CD3<sup>+</sup> T cells producing the IFN- $\gamma$ , TNF- $\alpha$ , IL-12 & IL-2 cytokines.

| <b>Responses</b>                                                                                   |                    |                                  |                                 | The average percentage of total CD3 <sup>+</sup> T cells. T-test for statistical analysis done between LPSA and Protein (64 kDa, 36 kDa, and 29 kDa) stimulated groups. n=4. Mean values $\pm$ SD. Significance level determined by Student's t-test, * $p < 0.05$ , compared to LPSA treated group. Level significance, ns $p > 0.05$ , * $p \leq 0.05$ , ** $p \leq 0.01$ . |                                   |                                   |
|----------------------------------------------------------------------------------------------------|--------------------|----------------------------------|---------------------------------|-------------------------------------------------------------------------------------------------------------------------------------------------------------------------------------------------------------------------------------------------------------------------------------------------------------------------------------------------------------------------------|-----------------------------------|-----------------------------------|
|                                                                                                    | <b>LPSA</b>        | <b>64 kDa</b>                    | <b>36 kDa</b>                   | <b>29 kDa</b>                                                                                                                                                                                                                                                                                                                                                                 | <b>PMA ionomycin</b>              | <b>PHA</b>                        |
| <b>Polyfunctional T cells IFN-<math>\gamma</math> TNF-<math>\alpha</math> &amp; IL-2 secretory</b> | 0.55<br>$\pm 0.07$ | 0.49<br>$\pm 0.105$              | 0.96<br>$\pm 0.47$              | 0.78<br>$\pm 0.35$                                                                                                                                                                                                                                                                                                                                                            | 0.46<br>$\pm 0.11$                | 0.86<br>$\pm 0.64$                |
| <b>IFN-<math>\gamma</math> &amp; TNF-<math>\alpha</math> secretory</b>                             | 0.53<br>$\pm 0.11$ | 3.97<br>$\pm 0.71^*(p=0.0286)$   | 3.39<br>$\pm 1.4^*(p=0.0286)$   | 1.67<br>$\pm 0.20^*(p=0.0286)$                                                                                                                                                                                                                                                                                                                                                | 3.95<br>$\pm 0.11^*(p=0.0286)$    | 1.5<br>$\pm 1.0^*(p=0.0286)$      |
| <b>IFN-<math>\gamma</math></b>                                                                     | 1.87<br>$\pm 0.23$ | 8.27<br>$\pm 0.88^*(p=0.0286)$   | 9.85<br>$\pm 1.54^*(p=0.0286)$  | 5.57<br>$\pm 0.52^*(p=0.0286)$                                                                                                                                                                                                                                                                                                                                                | 8.8<br>$\pm 1.3^*(p=0.0286)$      | 5.5<br>$\pm 1.96^*(p=0.0286)$     |
| <b>TNF-<math>\alpha</math></b>                                                                     | 5.32<br>$\pm 0.8$  | 20.9<br>$\pm 2.4^{**}(p=0.0079)$ | 18<br>$\pm 5.03^{**}(p=0.0079)$ | 7.35<br>$\pm 3.06$                                                                                                                                                                                                                                                                                                                                                            | 21.9<br>$\pm 2.56^{**}(p=0.0079)$ | 10.7<br>$\pm 2.82^{**}(p=0.0079)$ |
| <b>IL-2</b>                                                                                        | 2.09<br>$\pm 0.7$  | 4.30<br>$\pm 0.37^*(p=0.0286)$   | 9.24<br>$\pm 1.4^*(p=0.0286)$   | 3.9<br>$\pm 0.93$                                                                                                                                                                                                                                                                                                                                                             | 3.85<br>$\pm 1.2$                 | 5.96<br>$\pm 4.9$                 |
| <b>IL-10</b>                                                                                       | 1.2<br>$\pm 0.29$  | .94<br>$\pm 0.33$                | 1.39<br>$\pm 0.57$              | 3.29<br>$\pm 0.38^*(p=0.0286)$                                                                                                                                                                                                                                                                                                                                                | 1.7<br>$\pm 1.19$                 | 4.09<br>$\pm 1.81^*(p=0.0286)$    |

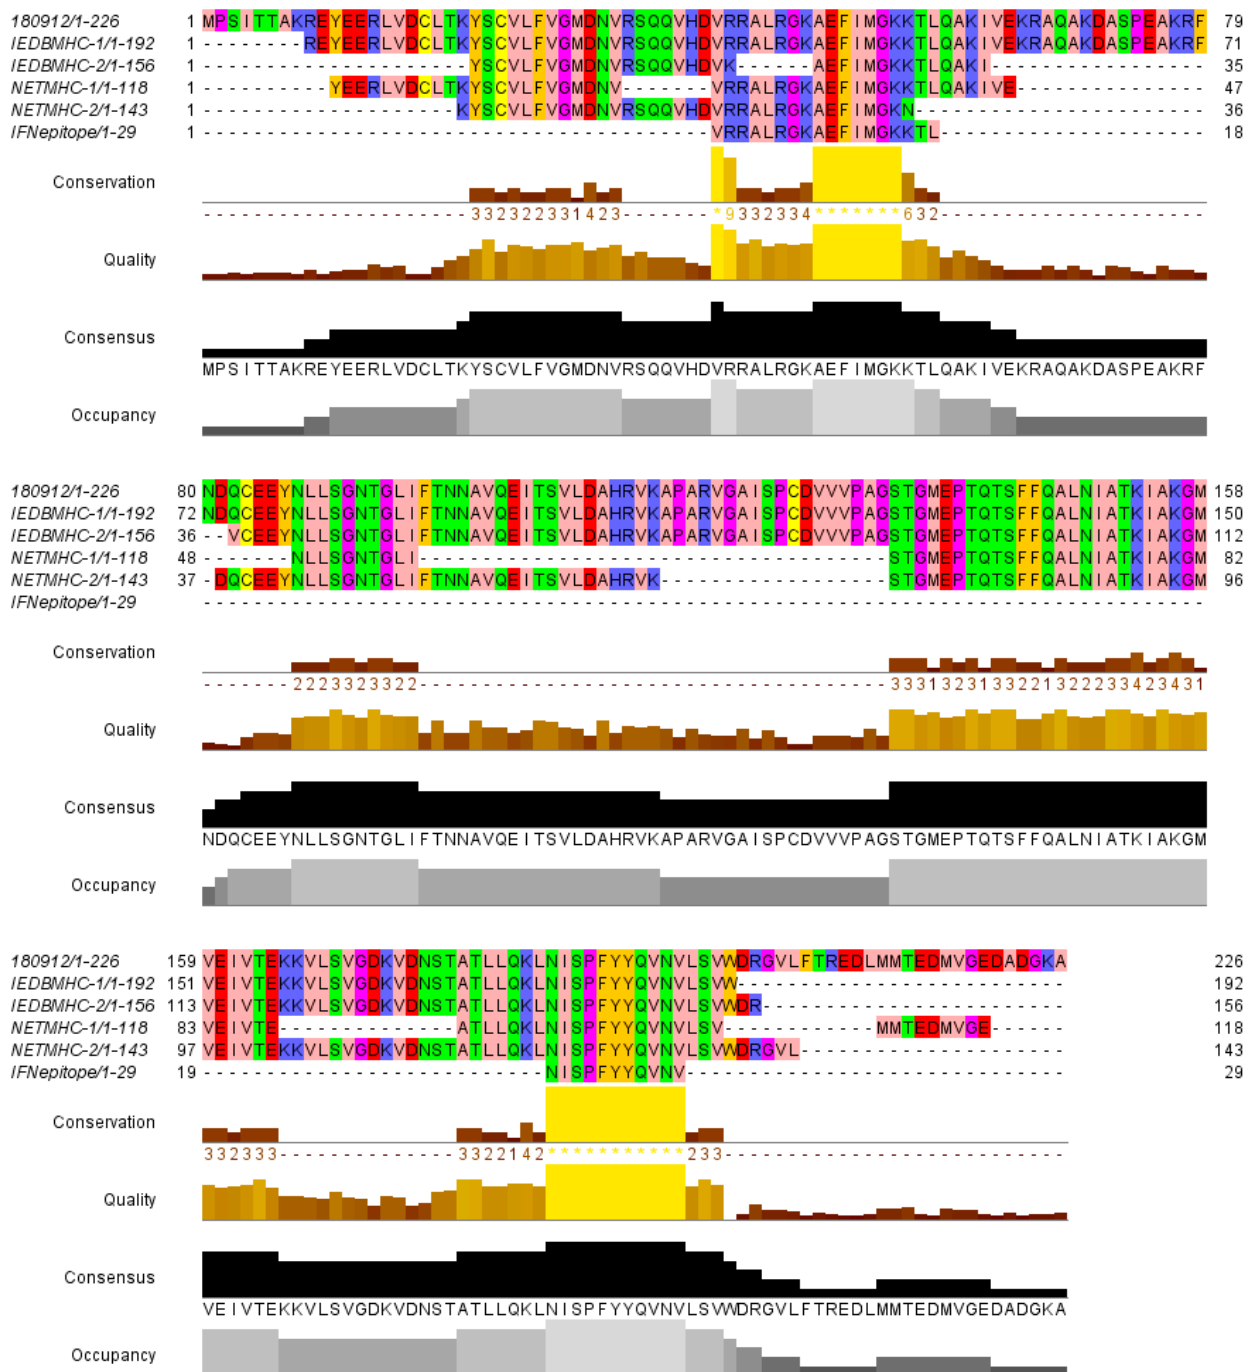

**Supplementary Figure 1.** Sequence alignment and epitope prediction for AY180912(F2/1). From top, Protein sequence AY180912, followed by T cell epitopes predicted by IEDB(MHC-I), IEDB(MHC-II), NETMHC-I, NETMHC-II & IFNepitope. Sequence alignment by Clustal Omega (EMBL-EBI).



377788/1-408  
NETMHC-2/1-310  
NETMHC-1/1-281  
IEDBMHC-2/1-288  
IEDBMHC-1/1-262  
IFNepitope/1-223

1 MEERDLPITDDHRKLVFSFIRMIRRSQVENPERAEAVAQMLGEEFGVDPAGSGGLHDTVEVDVLEAFKLTALR 71  
1 ERDLPITDDHRKLVFSFIRMIRRSQVENPERAEAVAQMLGEEFGVDPAGSGGLHDTVEVDVLEAFKLTALR 47  
1 KLVFSFIRMIRRSQVENPERAEAVAQMLGEEFGVDPAGSGGLHDTVEVDVLEAFKLTALR 48  
1 TDDHRKLVFSFIRMIRRSQVENPERAEAVAQMLGEEFGVDPAGSGGLHDTVEVDVLEAFKLTALR 36  
1 HRKLVFSFIRMIRRSQVENPERAEAVAQMLGEEFGVDPAGSGGLHDTVEVDVLEAFKLTALR 43  
1 KLVFSFIRMIRRSQVENPERAEAVAQMLGEEFGVDPAGSGGLHDTVEVDVLEAFKLTALR 40

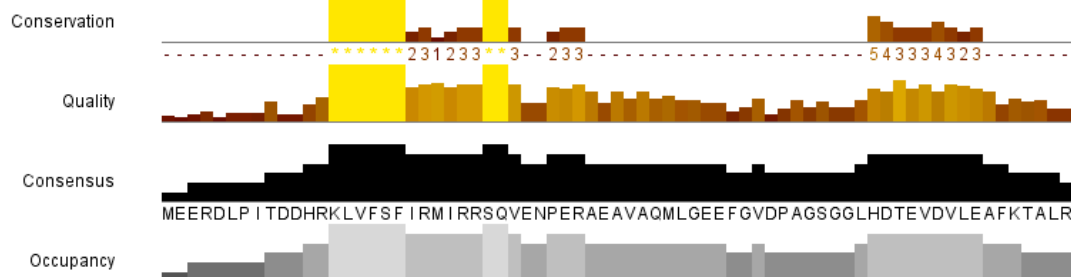

377788/1-408  
NETMHC-2/1-310  
NETMHC-1/1-281  
IEDBMHC-2/1-288  
IEDBMHC-1/1-262  
IFNepitope/1-223

72 EHERRSGVEQDEKFVCFVELLEKKGYFKGVEKGSDEYAQRLEKAREKFNQRNPNYEGLTAEQIKNKGNELM 142  
48 EHERRSGVEQDEKFVCFVELLEKKGYFKGVEKGSDEYAQRLEKAREKFNQRNPNYEGLTAEQIKNKGNELM 92  
49 AGVEQDEKFVCFVELLEKKGYFKGVEKGSDEYAQRLEKAREKFNQRNPNYEGLTAEQIKNKGNELM 92  
44 RSGVEQDEKFVCFVELLEKKGYFKGVEKGSDEYAQRLEKAREKFNQRNPNYEGLTAEQIKNKGNELM 72  
41 DEKVEQDEKFVCFVELLEKKGYFKGVEKGSDEYAQRLEKAREKFNQRNPNYEGLTAEQIKNKGNELM 78

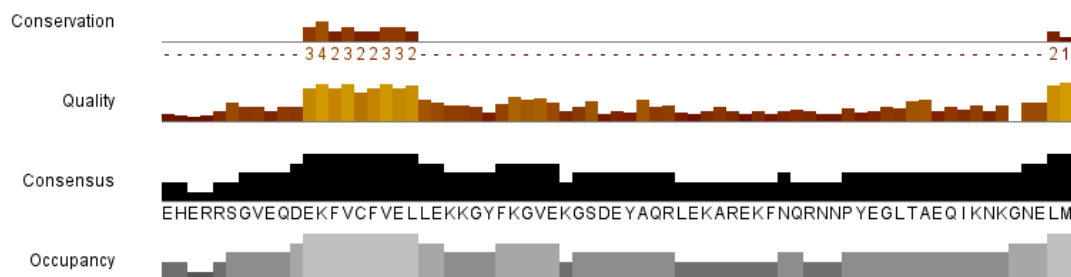

377788/1-408  
NETMHC-2/1-310  
NETMHC-1/1-281  
IEDBMHC-2/1-288  
IEDBMHC-1/1-262  
IFNepitope/1-223

143 SQAKYKEAIAYYTKAIELQPDNAVFFANRAAAHTHLKDYNNAIIDCERAIINPEYSKSYSRLGTALFYQE 213  
93 SQAKYKEAIAYYTKAIELQPDNAVFFANRAAAHTHLKDYNNAIIDCERAIINPEYSKSYSRLGTALFYQE 163  
93 SQAKYKEAIAYYTKAIELQPDNAVFFANRAAAHTHLKDYNNAIIDCERAIINPEYSKSYSRLGTALFYQE 148  
37 SQAKYKEAIAYYTKAIELQPDNAVFFANRAAAHTHLKDYNNAIIDCERAIINPEYSKSYSRLGTALFYQE 97  
73 SQAKYKEAIAYYTKAIELQPDNAVFFANRAAAHTHLKDYNNAIIDCERAIINPEYSKSYSRLGTALFYQE 138  
79 SQAKYKEAIAYYTKAIELQPDNAVFFANRAAAHTHLKDYNNAIIDCERAIINPEYSKSYSRLGTALFYQE 148

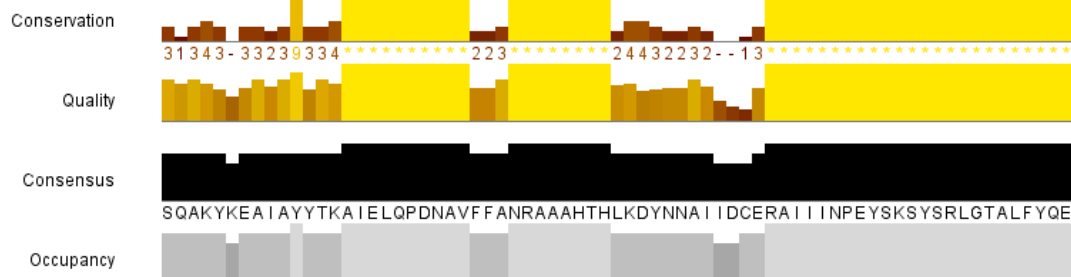

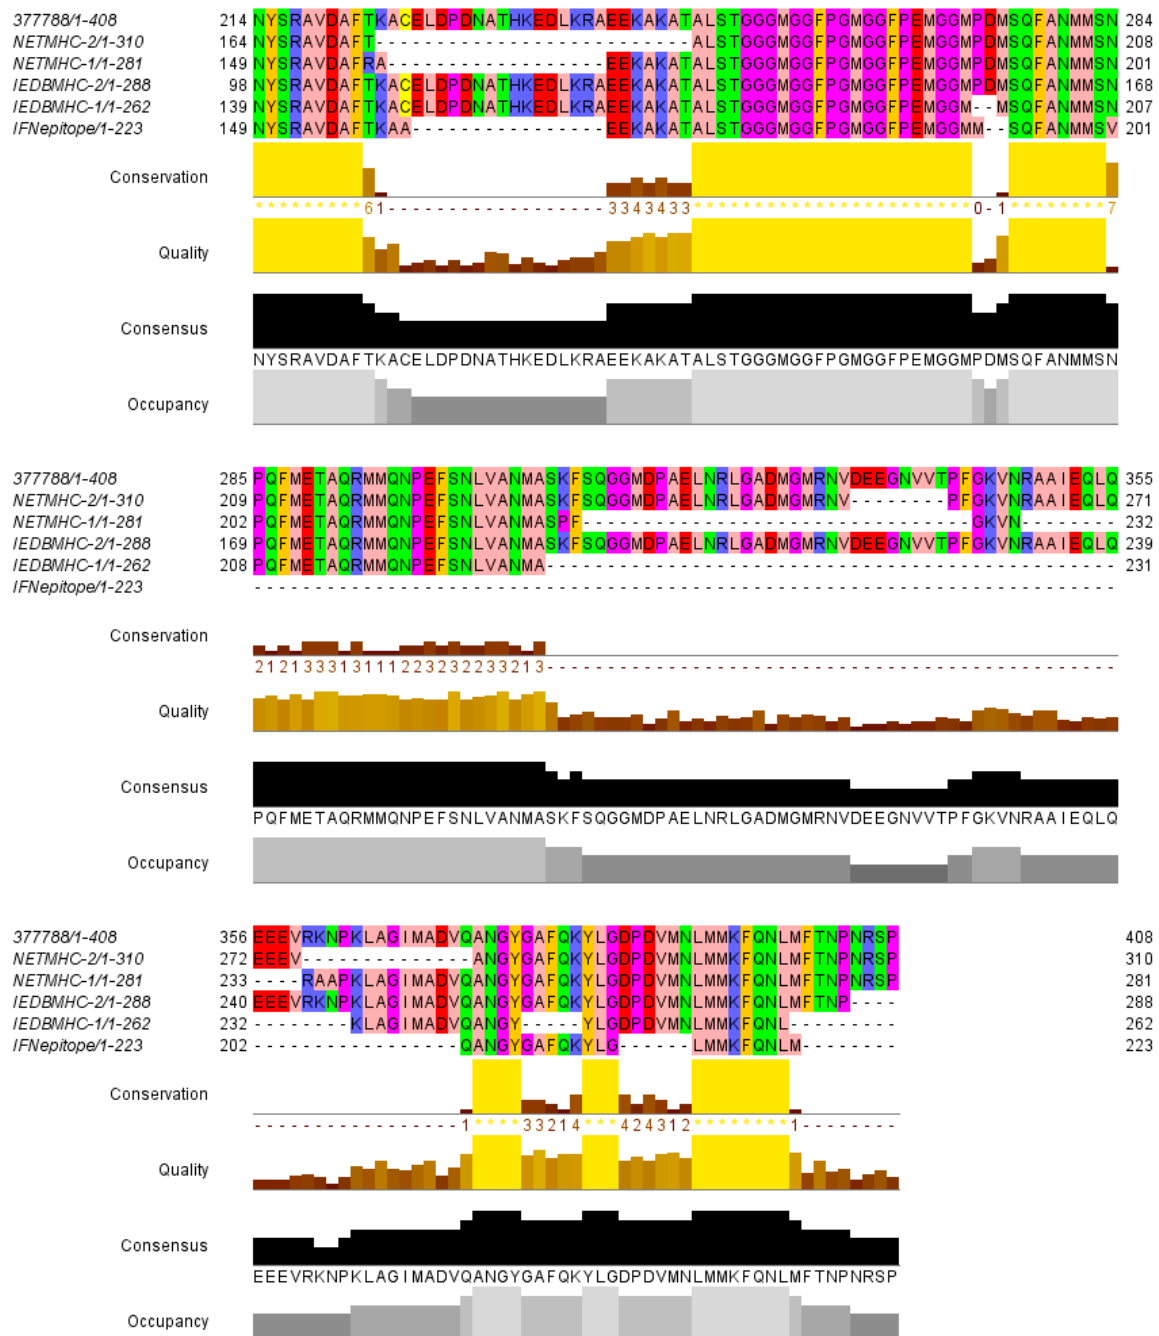

**Supplementary Figure 3.** Sequence alignment and epitope prediction for AY377788(A2/1). From top, Protein sequence AY377788, followed by T cell epitopes predicted by IEDB(MHC-I), IEDB(MHC-II), NETMHC-1, NETMHC-2 & IFNepitope. Sequence alignment by Clustal Omega (EMBL-EBI).



377788/1-408 1 -----MEERDLPITDDHRKLVFSFIRMIRRSQVENPERAEAVAQMLGEEFGVDPAGSGGLHDTTEVDVLEAFKLTALREHRRSGVEODEKFVC 87  
 180912/1-226 192 YQVNVLSVMWRGVLFITREQLMMEED-----MVGED-----ADGKA----- 226  
 161269/1-111 -----  
 IEDBMHC-1\_161269/1-82 -----  
 IEDBMHC-1\_377788/1-262 1 -----HRKLVFSF-----SQVENPERAEAVAQMLGEEFGV-----LHDTTEVDVLEAF-----RRSGVEODEKFVC 55  
 IEDBMHC-1\_180912/1-192 184 YQVNVLSVMWR-----TDDHRKLVFSFIRMIRRSQVENPERAEAVAQMLGEE----- 192  
 IEDBMHC-2\_161269/1-88 -----  
 IEDBMHC-2\_377788/1-288 1 -----TDDHRKLVFSFIRMIRRSQVENPERAEAVAQMLGEE----- 36  
 IEDBMHC-2\_180912/1-156 146 YQVNVLSVMWR-----ERDLPITDDHRKLVFSFIRMIRRSQVENPER-----HDTTEVDVLEAFKLTALREH-----EKFVC 156  
 NETMHC-2\_377788/1-310 1 -----ERDLPITDDHRKLVFSFIRMIRRSQVENPER-----HDTTEVDVLEAFKLTALREH-----EKFVC 54  
 NETMHC-2\_161269/1-95 -----  
 NETMHC-2\_180912/1-143 130 YQVNVLSVMWRGVLF----- 143  
 NETMHC-1\_161269/1-54 -----  
 NETMHC-1\_377788/1-281 1 -----KLVFSFIRMIRRSQ-----PERAEAVAQMLGEEFGVDPAGSGGLHDTTEVDVLE-----AGVEODEKFVC 59  
 NETMHC-1\_180912/1-118 102 YQVNVLSVMWRGVLF----- 118  
 64/1-993 269 YQVNVLSVMWRGVLFGGHRKLVFSFIRMIRRSQVENPERAEAVAQMLGEEFGVDPAGSGGLHDTTEVDVLEAFKLTALREHRRSGVEODEKFVC 361

Conservation

Quality

Consensus

Occupancy

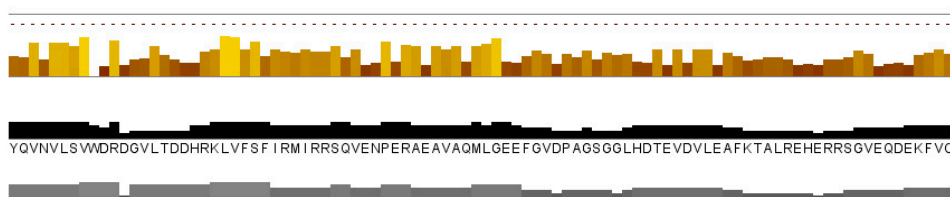

377788/1-408 88 FVELLEKKGYFKGVEKGSDEYADRLKAREKFNQRNPNYEGLTAEQIKKGNELMSQAKYKEAIAYYTKAIELOPDNAVFFANRAAAHHLKDY 181  
 180912/1-226 -----  
 161269/1-111 -----  
 IEDBMHC-1\_161269/1-82 -----  
 IEDBMHC-1\_377788/1-262 56 FVELGSD-----SYAQRLELMSQAKYKEAIAYYTKAIELOPDNAVFFANRAAAHHLKDY 110  
 IEDBMHC-1\_180912/1-192 -----  
 IEDBMHC-2\_161269/1-88 -----  
 IEDBMHC-2\_377788/1-288 37 -----FYTKAIELOPDNAVFFANRAAAHHLKDY 65  
 IEDBMHC-2\_180912/1-156 -----  
 NETMHC-2\_377788/1-310 55 FVELLEKKGYFKGVE-----NQRNPNYEGLTAEQIKKGNELMSQAKYKEAIAYYTKAIELOPDNAVFFANRAAAHHLKDY 131  
 NETMHC-2\_161269/1-95 -----  
 NETMHC-2\_180912/1-143 -----  
 NETMHC-1\_377788/1-281 60 FVELLEKKGYFKGVE-----PYEGLTAEQIKKGNELMSQAKYKEAIAYYTKAIELOPDNAVFFANRAAAHHLKDY 122  
 NETMHC-1\_180912/1-118 -----  
 64/1-993 362 FVELLEKKGYFKGVEKGG-----PYEGLTAEQIKKGNELMSQAKYKEAIAYYTKAIELOPDNAVFFANRAAAHHLKDY 436

Conservation

Quality

Consensus

Occupancy

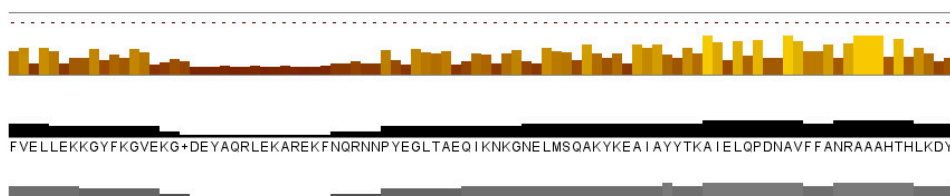

377788/1-408 182 NNAIDCERAIINPEYKSYSRLGTALFYDENYSRAVDFTKACELDPDNATHKEDLKRAEEKAKATALSTGGMGGFPGMGFPFMGGMPDM 275  
 180912/1-226 -----  
 161269/1-111 -----  
 IEDBMHC-1\_161269/1-82 -----  
 IEDBMHC-1\_377788/1-262 111 NNAI-----RAIINPEYKSYSRLGTALFYDENYSRAVDFTKACELDPDNATHKEDLKRAEEKAKATALSTGGMGGFPGMGFPFMGGMPDM 198  
 IEDBMHC-1\_180912/1-192 -----  
 IEDBMHC-2\_161269/1-88 -----  
 IEDBMHC-2\_377788/1-288 66 NNAIDCERAIINPEYKSYSRLGTALFYDENYSRAVDFTKACELDPDNATHKEDLKRAEEKAKATALSTGGMGGFPGMGFPFMGGMPDM 159  
 IEDBMHC-2\_180912/1-156 -----  
 NETMHC-2\_377788/1-310 132 NNAIDCERAIINPEYKSYSRLGTALFYDENYSRAVDFT-----ALSTGGMGGFPGMGFPFMGGMPDM 199  
 NETMHC-2\_161269/1-95 -----  
 NETMHC-2\_180912/1-143 -----  
 NETMHC-1\_377788/1-281 123 -----LERAIINPEYKSYSRLGTALFYDENYSRAVDFT-----AEEKAKATALSTGGMGGFPGMGFPFMGGMPDM 192  
 NETMHC-1\_180912/1-118 -----  
 64/1-993 437 NNAIDCERAIINPEYKSYSRLGTALFYDENYSRAVDFTGG-----AEEKAKATALSTGGMGGFPGMGFPFMGGMPDM 514

Conservation

Quality

Consensus

Occupancy

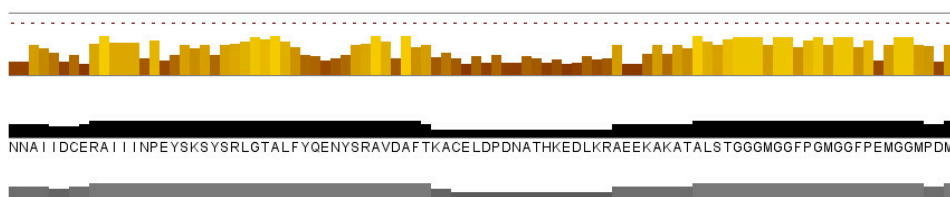

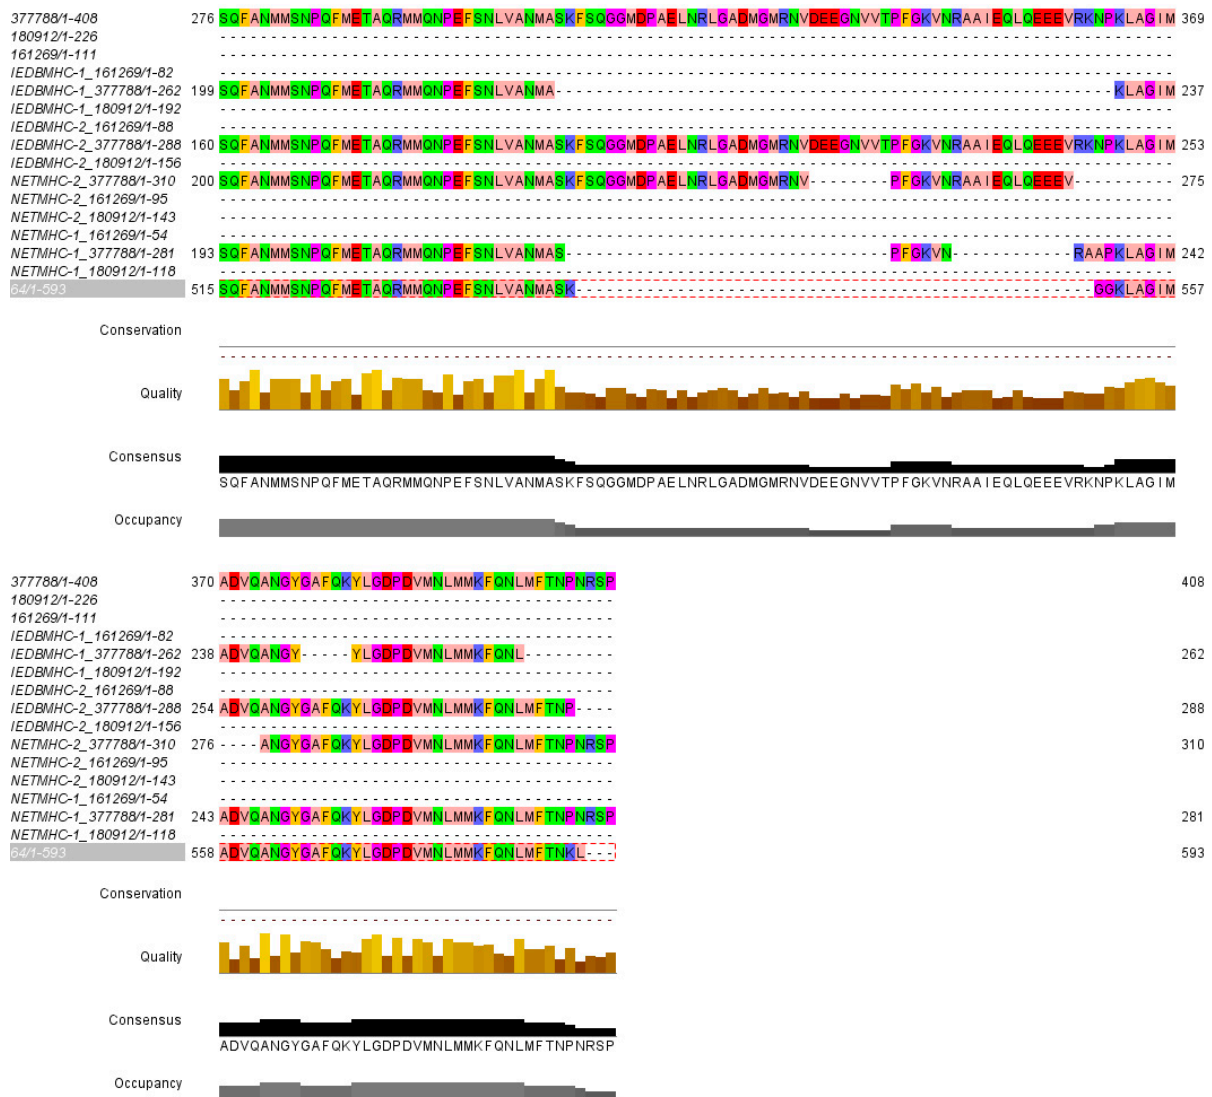

**Supplementary Figure 4.** Selection of epitopes for designing of construct 1 (64 kDa). Protein sequence alignment of 3 genes (A2/1, B4/1 & F2/1) with respective epitope prediction by IEDB MHC-I IEDB-MHC-II NETMHC-I & NETMHC-II for each gene, followed by selected sequences for multiepitope 64 kDa protein. Sequence alignment by Clustal Omega (EMBL-EBI).

180912/1-226 1 MPSITTAKEYEERLVDCLTKYSCVLFVGMDNVRSQGVHDVRRALRGKAEFIMGKKTLCAKIVEKRAQAKDASPEAKRFNDG 82  
 377788/1-408 1 .....MSAETLACTYAALMLSDAGLPISAEINIAAA 30  
 161269/1-111 1 .....VRRALRGKAEFIMGKKTLNIS 21  
 IFNepitope\_180912/1-29 1 .....SAENIAAA 8  
 IFNepitope\_377788/1-223 1 .....HHHHHGSVRRALRGKAEFIMGKKTLGGNISPFFYYGVNVGGSAEINIAAA 49  
 IFNepitope\_161269/1-71 36\_kDA/1-348

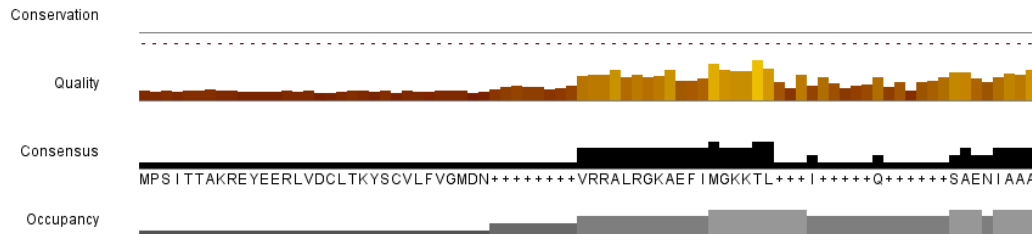

180912/1-226 83 CEEYNLLSGNTGLIFTNNAVQ.....EITSVLDAHRVKAPAR 119  
 377788/1-408 1 .....MEERDLPIITDHRKLVFSFIR 21  
 161269/1-111 31 VKAAGVEMRPTLPILIFARFLEKKSVELTMAAAAAQAPTAAAPSPAAGAAASAAAAGGKVEDKKKDEPEEEG-DDDMGFGLFD 111  
 IFNepitope\_180912/1-29 1 .....KLVFSFIR 8  
 IFNepitope\_377788/1-223 9 VKAAGVEMRPTLPILIFARFLEKA.....ASAPSPAAGAAASAAAAGGKVEDKKKDEPEEEG-DDDMGFGL-- 71  
 IFNepitope\_161269/1-71 50 VKAAGVEMRPTLPILIFARFLEKGG.....AASAPSPAAGAAASAAAAGGKVGEEGDDDMGFGLGGLKLVFSFIR 117  
 36\_kDA/1-348

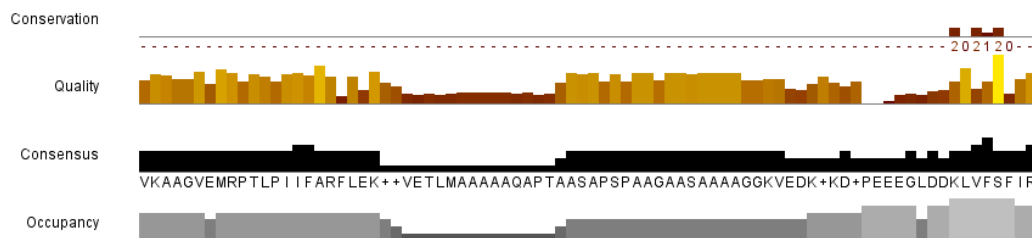

180912/1-226 120 VGAISPCD.....VVVPAGSTGMEPTOTSFFQALNIATKI.....AKGMVEIVTEKK-VLSVGD 172  
 377788/1-408 22 MIRRSQVENPERAEAVAGMLGEEFGVDPAGSGGLHDTVDVLEAFKKTALREHERRSGVEODEKFVCFVELLEKKGYFKGVEK 103  
 161269/1-111 9 MIRRSQ.....VVDPAAGSGGLHDTVDVLEAFKTAL.....DDEKFVCFVELLE...FKGVEK 58  
 IFNepitope\_180912/1-29 118 MIRRSQVG.....GVDPAGSGGLHDTVDVLEAFKTALGG.....DDEKFVCFVELLEKGG-FKGVEK 174  
 IFNepitope\_377788/1-223 36\_kDA/1-348

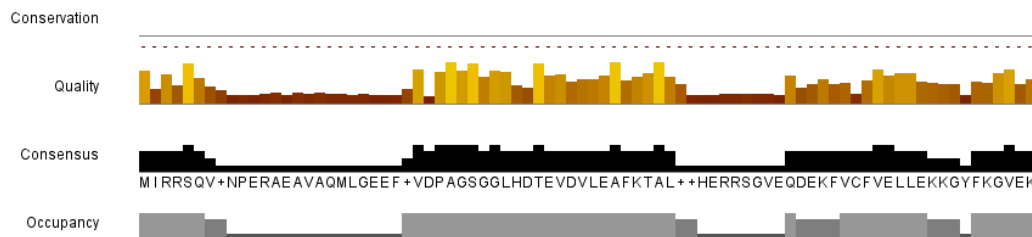

180912/1-226 173 KYDNST A-----TLL--QKLNISFYQVNVLSVWDRGVLFTRDLMMTE--DMVGED 221  
 377788/1-408 104 GSDEYAQRLEKAREKFNQRNNPYEGLTAEQIKNKGNELMSQAKYKEAIAYYTKAIELOPDNAVFFANRAAAHTHLKDYNNAI 185  
 161269/1-111  
 IFNepitope\_180912/1-29 22 PFYQVNV----- 29  
 IFNepitope\_377788/1-223 59 GSDEYAQRLEKAREKFN-----ELMSQAKYE-AIAYYTKAIELOPDNAVFFANRAAAHTHLKDYNNAI 120  
 IFNepitope\_161269/1-71  
 36\_kDA/1-348 175 GSDEYAQRLEKAREKFG-----GNELMSQAKYKEAIAYYTKAIELOPDNAVFFANRAAAH-----THLGGI 235

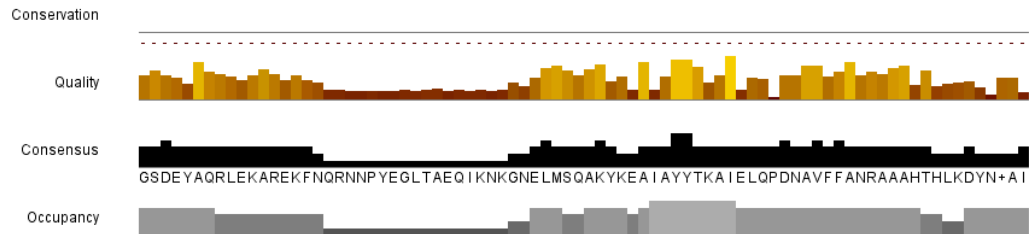

180912/1-226 222 ADGKA----- 226  
 377788/1-408 186 IDCERAIINPEYSKSYSRLGTALFYDENYSRAVDATKACELDPDNATHKEDLKRAEEKAKATALSTGGMGFFPGMGFF 267  
 161269/1-111  
 IFNepitope\_180912/1-29  
 IFNepitope\_377788/1-223 121 IDCERAIINPEYSKSYSRLGTALFYDENYSRAVDATKA-----AEEKAKATALSTGGMGFFPGMGFF 186  
 IFNepitope\_161269/1-71  
 36\_kDA/1-348 236 IDCERAIINPEYSKSYSRLGTALFYDENYSRAVDATKAG-----GAEEKAKATALSTGGMGFFPGMGFF 303

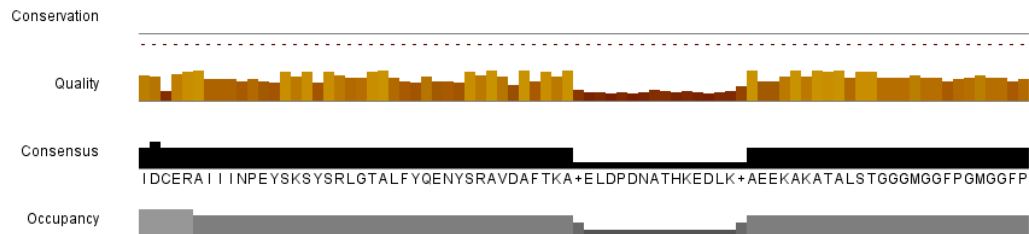

180912/1-226 268 EMGGMPDMSQFANMMSNPQFMETAQRMMQNPEFSNLVANMASKFSQGGMDPAELNRLGADMGMNRNVDEEGNVVTFPGKVNR 349  
 377788/1-408  
 161269/1-111  
 IFNepitope\_180912/1-29  
 IFNepitope\_377788/1-223 187 EMGGM--MSQFANMMS----- 200  
 IFNepitope\_161269/1-71  
 36\_kDA/1-348 304 EMGGMPDMSQFANMMSGG----- 321

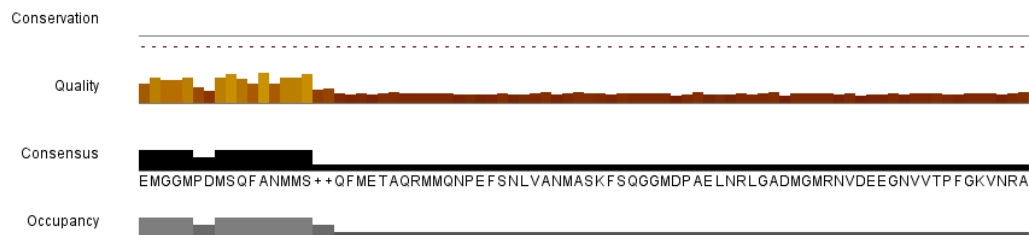

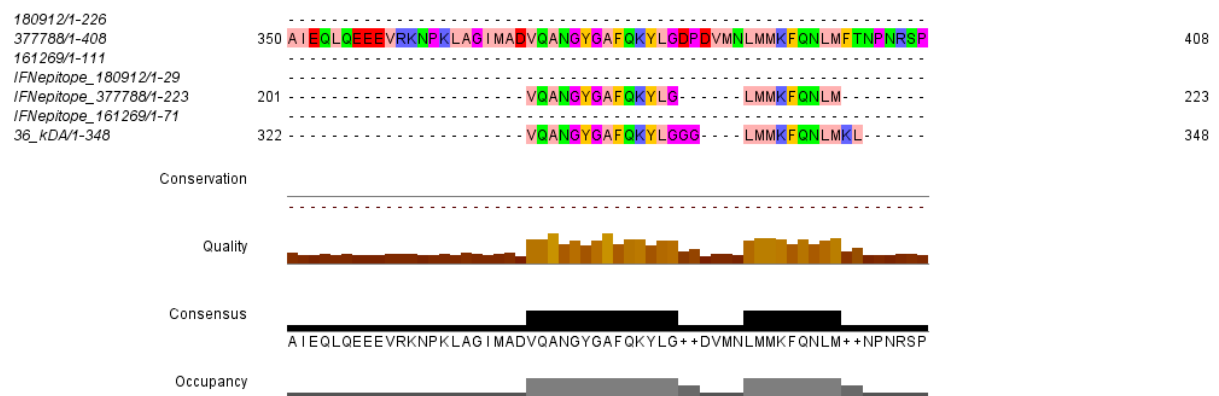

**Supplementary Figure 5.** Selection of epitopes for designing of construct 2 (36 kDa). Protein sequence alignment of 3 genes (A2/1, B4/1 & F2/1) with epitope prediction by IFNepitope for each gene, followed by selected sequences for multiepitope 36 kDa protein. Sequence alignment by Clustal Omega (EMBL-EBI).

161269/1-111  
180912/1-226  
377788/1-408  
IFNepitope\_161269/1-71  
IFNepitope\_180912/1-29  
IFNepitope\_377788/1-223  
29\_kDa/1-258

1 ..... MEERDLPITDDHRKLVFSFIRMI RRSQVENPERAEAVAQMLGEEFGVDPAGSGGLHDT 58  
1 ..... KLVFSFIRMI RRSQV ..... VDPAGSGGLHDT 27  
1 HHHHHHGSMEERDLPITDDHRKLVFSFIRMI RRSQVENP ..... 39

Conservation

Quality

Consensus

Occupancy

161269/1-111  
180912/1-226  
377788/1-408  
IFNepitope\_161269/1-71  
IFNepitope\_180912/1-29  
IFNepitope\_377788/1-223  
29\_kDa/1-258

1 ..... MPSIT ..... 5  
59 EVDVLEAFKLTALREHERRSGVEQDEKFVCFVELLEKKGYFKGVEKGSDEYAQRLEKAREKFNQNN 124  
28 EVDVLEAFKLTAL ..... QDEKFVCFVELLE ..... FKGVEKGSDEYAQRLEKAREKFN ..... 76  
40 EVDVLEAFKLTALREHERRSGVEQDEKFVCFVELLEKKGYFKGVEKGSDEYA ..... 89

Conservation

Quality

Consensus

Occupancy

161269/1-111  
180912/1-226  
377788/1-408  
IFNepitope\_161269/1-71  
IFNepitope\_180912/1-29  
IFNepitope\_377788/1-223  
29\_kDa/1-258

1 ..... MSAETLACTY 10  
6 ..... TAKREYEEERLVDCLT 20  
125 PYEGLTAEQIKNKGNELMSQAKYKEAIAYYTKAIELQPDNAVFFANRAAAHTLKDYNNAIIDCER 190  
77 ..... LMSQAKY-EAIAYYTKAIELQPDNAVFFANRAAAHTLKDYNNAIIDCER 125  
90 ..... VFFANRAAAHTL ..... 102

Conservation

Quality

Consensus

Occupancy

161269/1-111 11 AAL----- 13  
 180912/1-226 21 KYS----- 23  
 377788/1-408 191 AIIINPEYKSYSRGLTALFYQENYSRAVD AFTKACELDPDNATHKEDLKRAEEKAKATALSTGGG 256  
 IFNepitope\_161269/1-71  
 IFNepitope\_180912/1-29  
 IFNepitope\_377788/1-223 126 AIIINPEYKSYSRGLTALFYQENYSRAVD AFTKAA----- EEKAKATALSTGGG 175  
 29\_kDa/1-258 103 ----- KKEDLKRAEEKAKATALSTGGG 124

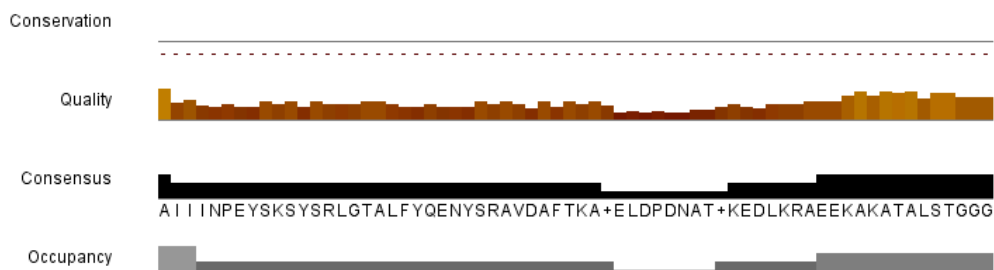

161269/1-111 14 ----- MLSD----- 17  
 180912/1-226 24 ----- CVLFVGM----- 30  
 377788/1-408 257 MGGFPGMGGFP E MGGMPDMSQFANMMSNPQF METAQRMQNPEFSNLVAVNMAS KFSQGGMDPAELN 322  
 IFNepitope\_161269/1-71  
 IFNepitope\_180912/1-29  
 IFNepitope\_377788/1-223 176 MGGFPGMGGFP E MGGMM- - SQFANMMS- - 200  
 29\_kDa/1-258 125 MGGFPGMGGFP E MGGMPDMSQ- - - MMSNPQF METAQRMQNPEFSNLVAVNLMMLFONLMFTNMP 187

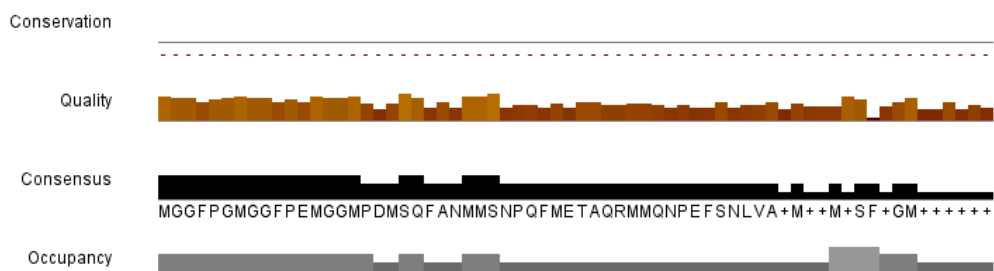

161269/1-111 18 ----- AGLPT- - - SAENIAAAVKAAGVEMRPTLP I I - - - FARE 49  
 180912/1-226 31 - - - DNVRSGQVHDVRRALRGKAEFIMGKKT LQAK I - - - - - VEKRAQAKDASP - - - - - EAKRF 79  
 377788/1-408 323 RLGA D - - - MGMRNVDE - - - EGNVVT PFGKVNRAAI EQLOEEEV RKNP KLAG I MADV GANGYGAFOKY 383  
 IFNepitope\_161269/1-71 1 - - - - - SAENIAAAVKAAGVEMRPTLP I I - - - - - FARE 27  
 IFNepitope\_180912/1-29 1 - - - - - VRRALRGKAEFIMGKKT L N I S - - - - - V GANGYGAFOKY 21  
 IFNepitope\_377788/1-223 201 - - - - - - - - - - - - - - - - - - - - - V GANGYGAFOKY 212  
 29\_kDa/1-258 188 S I T T A K R E Y E V H D V R R A L R G K A E F I M G K K - - - - - A V K A A G V E M R P T L P I I - - - - - F A R F 236

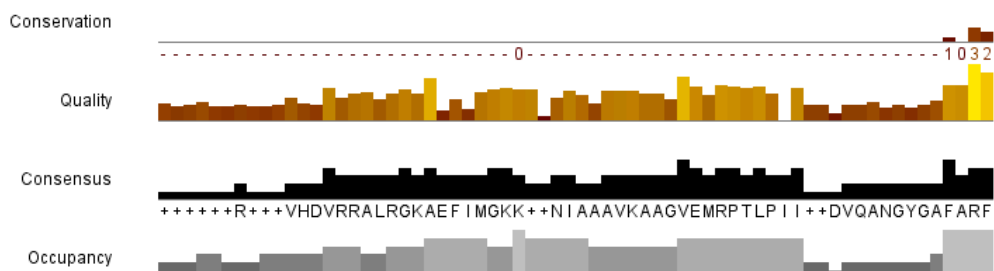

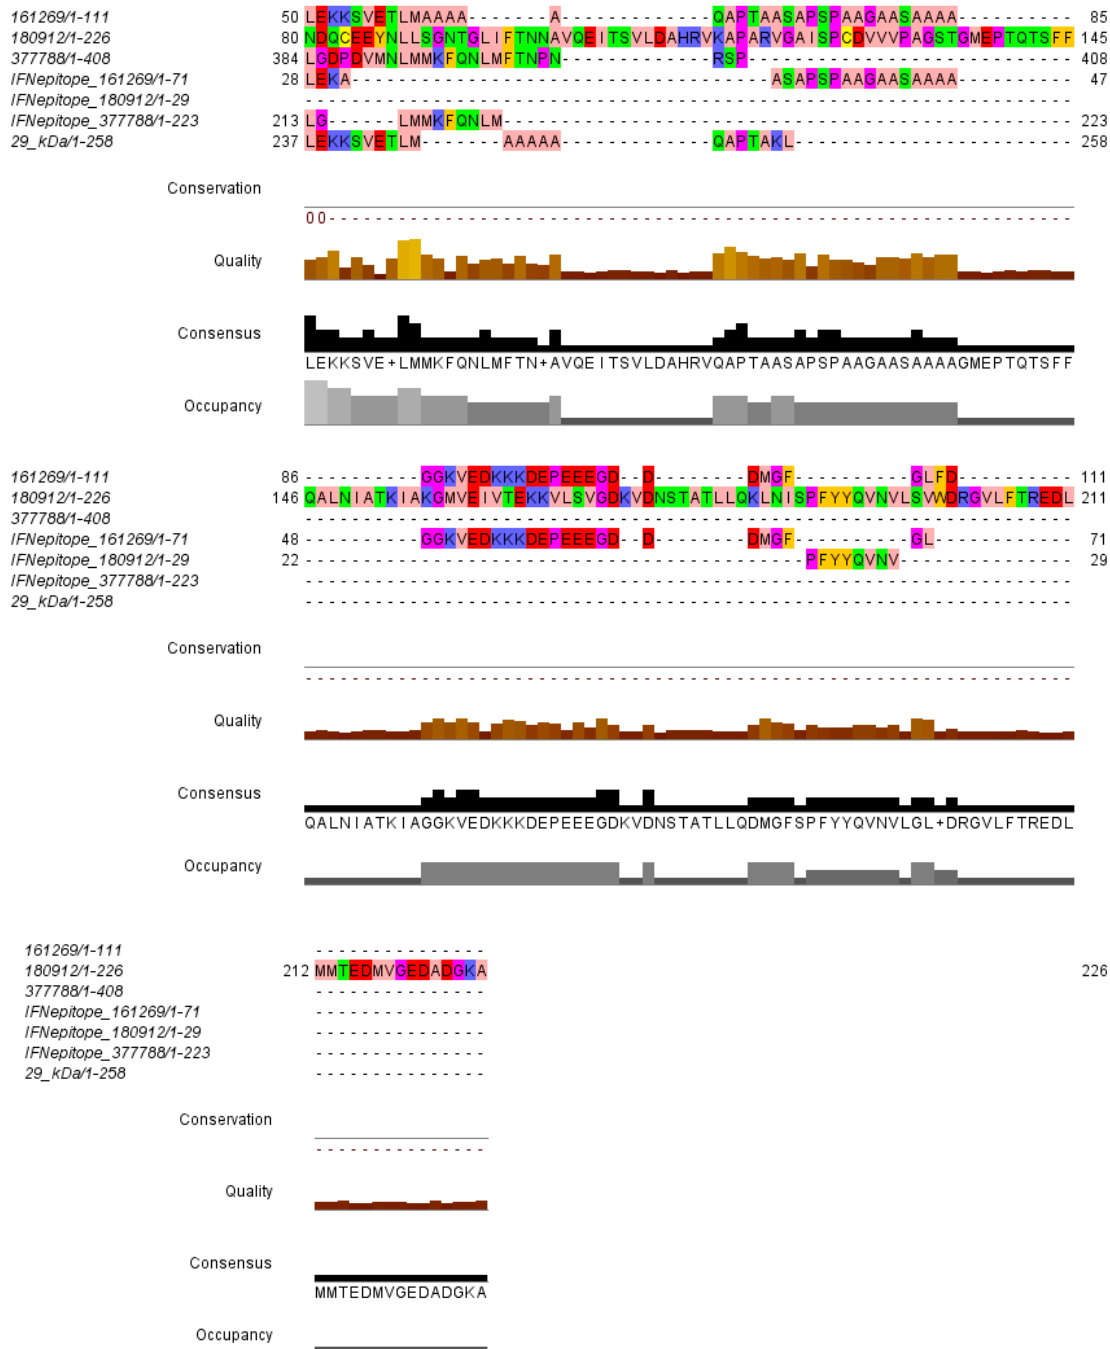

**Supplementary Figure 6.** Selection of epitopes for designing of construct 3 (29 kDa). Protein sequence alignment of 3 genes (A2/1, B4/1 & F2/1) with epitope prediction by IFNepitope for each gene, followed by selected sequences for multiepitope 29 kDa protein. Sequence alignment by Clustal Omega (EMBL-EBI).

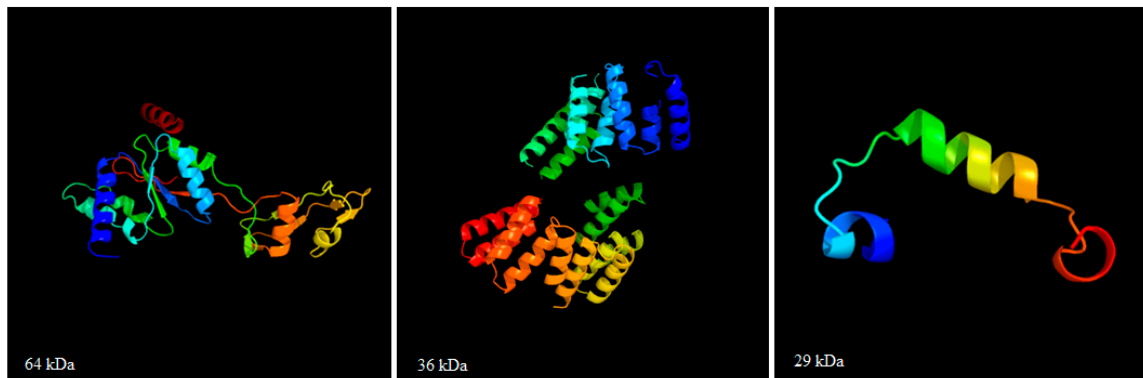

**Supplementary Figure 7.** 64 kDa, 36 kDa & 29 kDa protein structure. Structure prediction by Phyre2(Protein Homology/analogy Recognition Engine V 2.0).

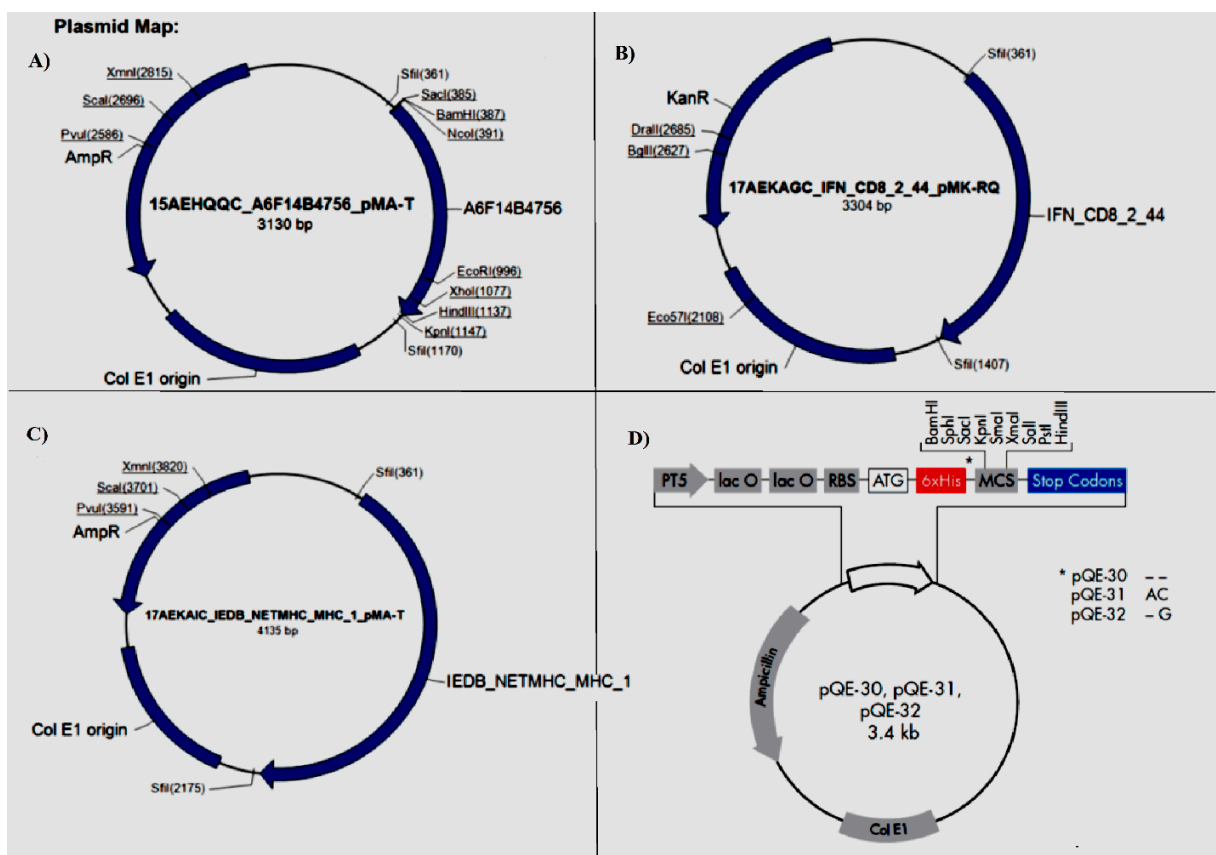

**Supplementary Figure 8.** A) Plasmid vector Map for 756 bp insert in pMA-T, total size 3130 bp, B) Plasmid vector Map for 1026 bp insert in pMK-RQ, total size 3304 bp, C) Plasmid vector Map for 1761 bp insert in pMA-T, total size 4135 bp & D) Plasmid vector Map for pQE30 (Qiagen), 3461 bp.

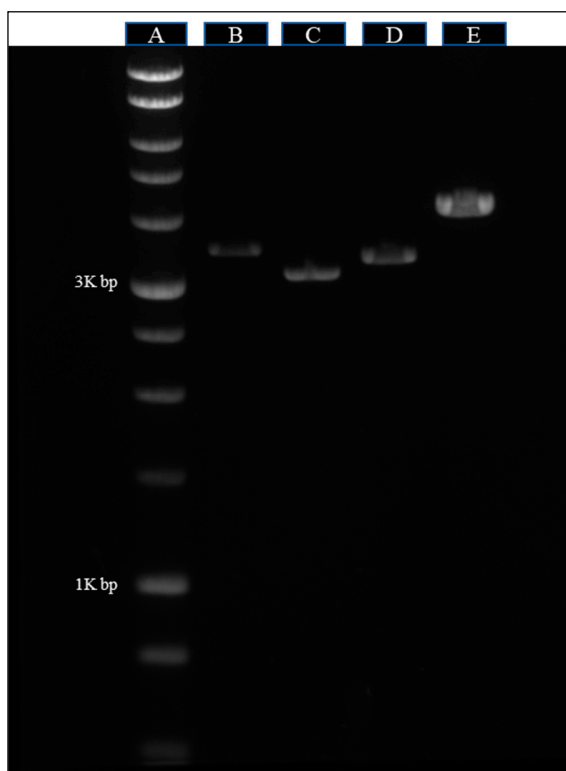

**Supplementary Figure 9.** Linear Plasmid separation on 1.5% Agarose gel: Lane A Ladder 1k bp, Lane B pQE30 3461 bp, Lane C pMA-T 3130 bp, Lane D pMK-RQ 3304 bp, & Lane E pMA-T 4135 bp. Ladder 1k bp, Cat. G5711 (Promega USA)

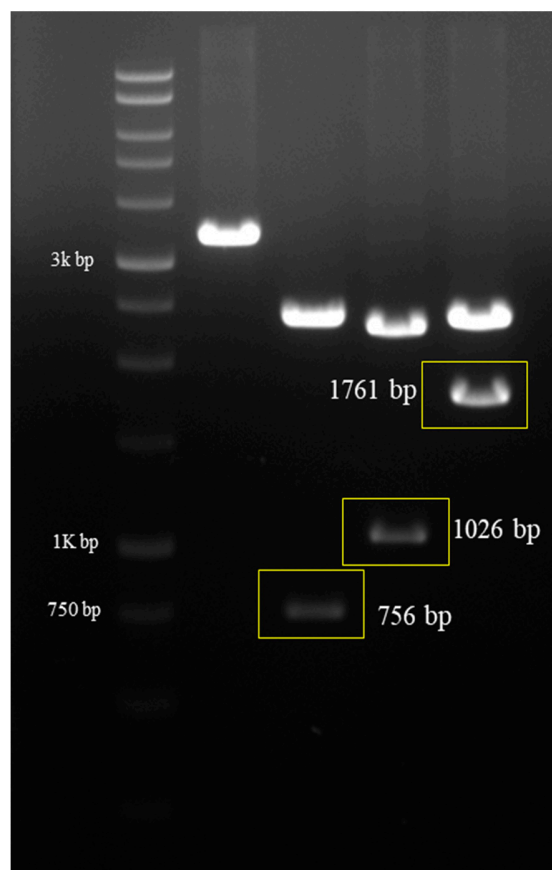

**Supplementary Figure 10.** Double digestion of plasmid, product separation on 1.5% Agarose gel: Lane A- Ladder 1k bp, Lane B- pQE30(3461), Lane C- pMA-T (2374+756), Lane D- pMk-RQ (2278+1026), lane E pMA-T (2374+1761). Ladder 1k bp, Cat. G5711 (Promega USA)

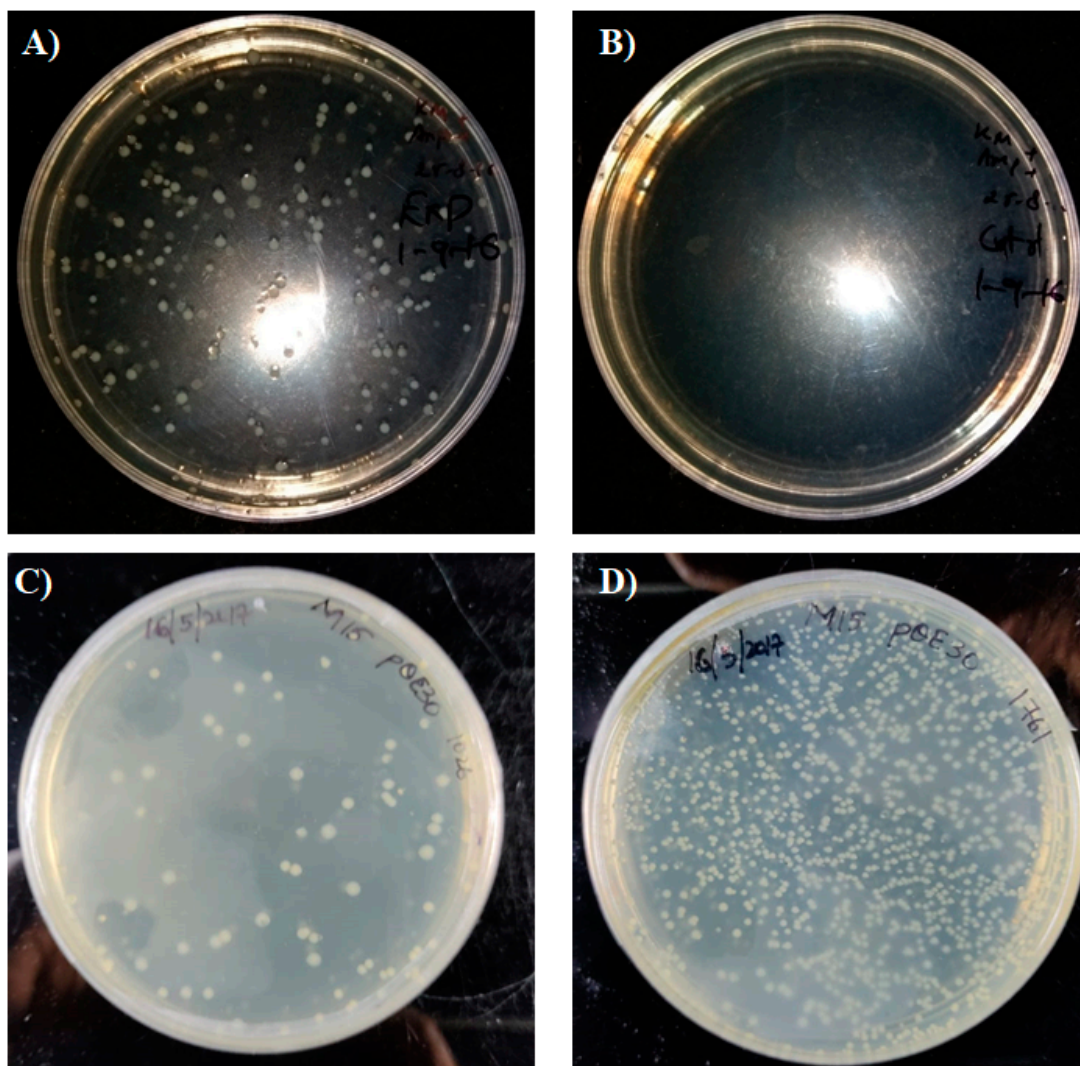

**Supplementary Figure 11.** LB agar plates with overnight culture of transformed *E. coli*(M15). **A)** transformation with vector plus 756 bp inserts, **B)** empty vector (w/o insert), **C)** transformation with vector plus 1036 bp insert & **D)** transformation with vector with 1761 bp insert.

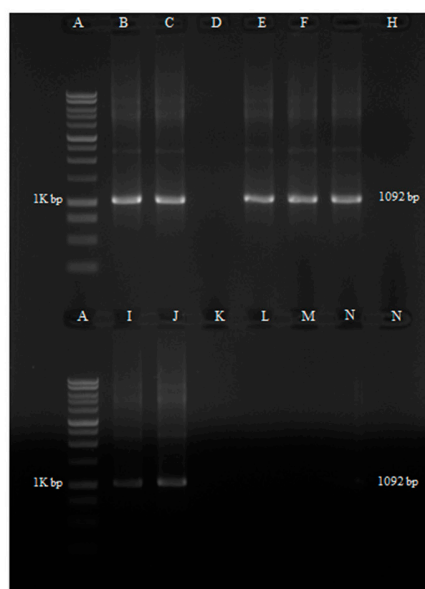

**A)**

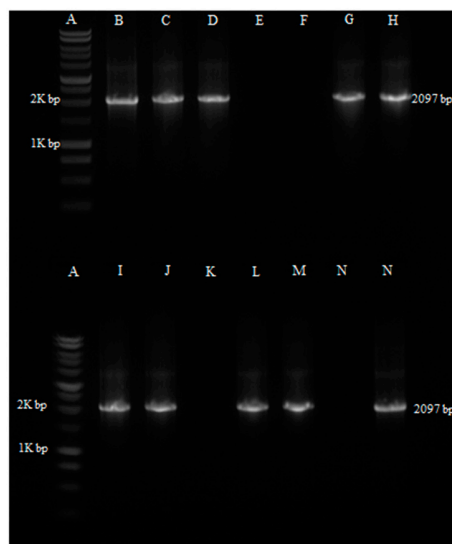

**B)**

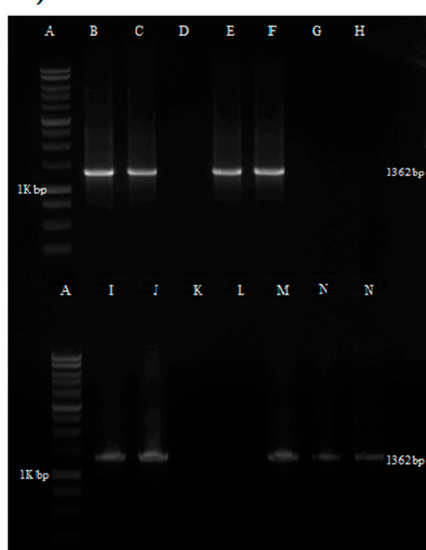

**C)**

**Supplementary Figure 12.** **A)** 1 % Agarose gel separation of Colony PCR products, for 756 bp insert confirmation, of expected band size  $336 + 756 = 1092$  bp. Lane A 1kb Ladder, Lane B to N bacteria colony. **B)** 1 % Agarose gel separation of Colony PCR products, for expected band size of 2097 bp ( $336 + 1761$ ). **C)** 1 % Agarose gel separation of Colony PCR products, for expected band size 1362 bp ( $336 + 1026$ ) on right. Lane A 1kb Ladder, Lane B to N, bacteria colony. Ladder 1k bp, Cat. G5711 (Promega USA)

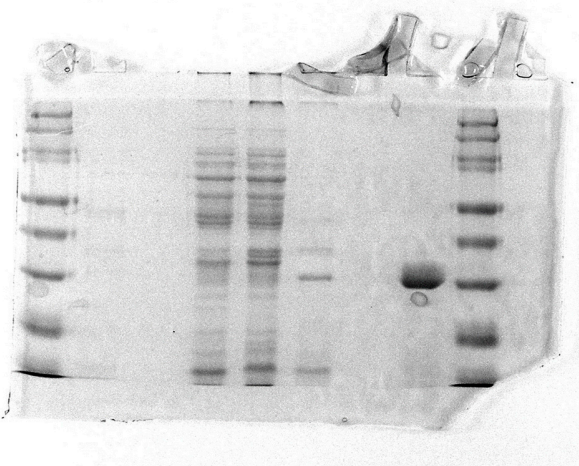

1)

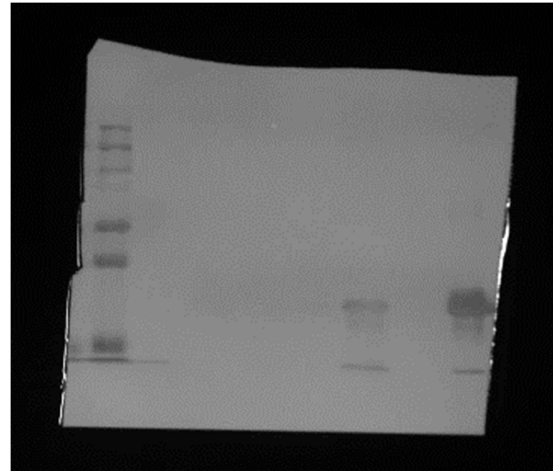

2)

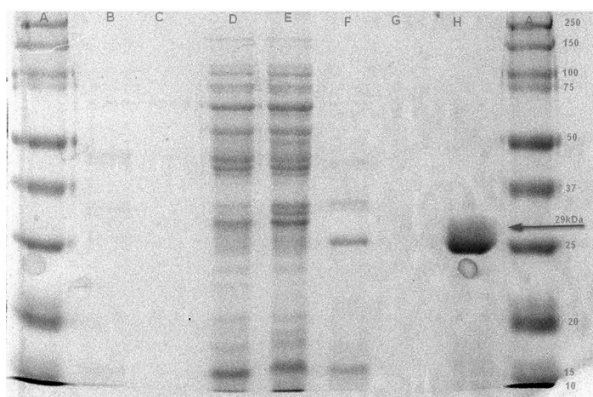

12% SDS-PAGE, Coomassie Blue Stained

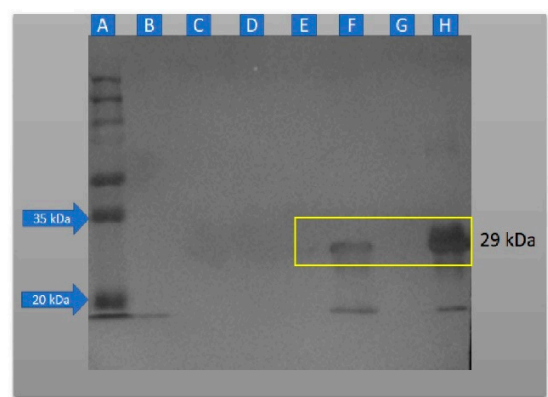

Western Blot for Poly-HIS antibody, Substrate System 3,3',5,5'-Tetramethylbenzidine (TMB)

3)

4)

**Supplementary Figure 13 A.** 12% SDS-PAGE, Coomassie stain and Western Blot using Poly-HIS antibody, for different steps of protein formation and isolation from inclusion bodies of *E. coli*(M15), using 0.1 mM IPTG overnight at 37°C. Lane A: Ladder 250 kDa (BioRad 1610374) B: LB broth after IPTG induction C: Empty Lane, D: Bacterial lysate after 10,000 g spin E: Resuspension buffer discard, F: Deoxycholic acid wash discard, G: Final wash discard, and H: Resuspended Protein 29 kDa pellet in ddH<sub>2</sub>O. Western blot, poly-HIS antibody with substrate system 3,3',5,5'-Tetramethylbenzidine (TMB). 1) & 2). Uncropped images. 3) & 4). Cropped Images.

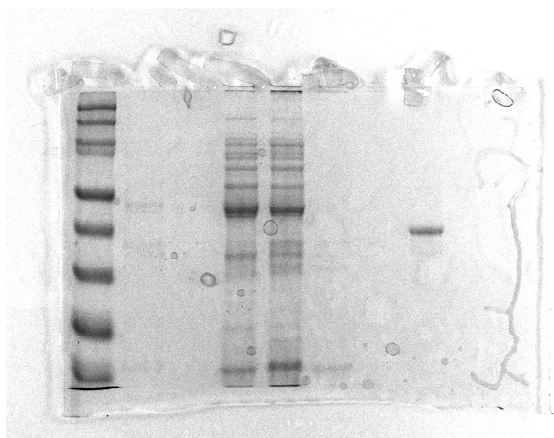

1)

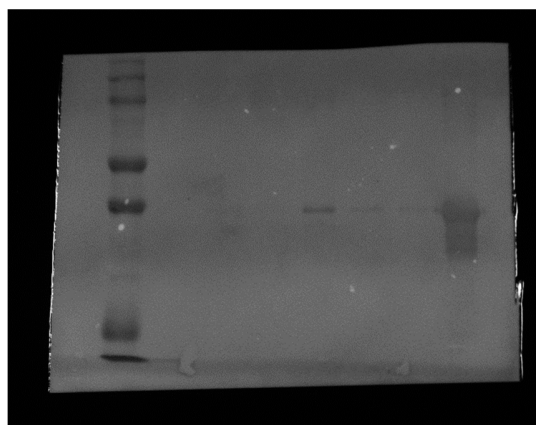

2)

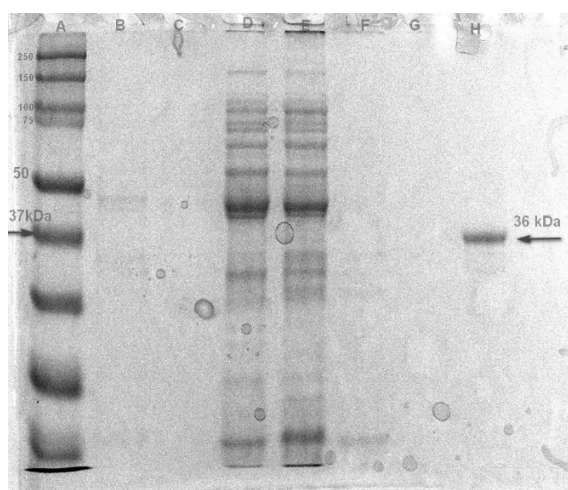

12 % SDS-PAGE Coomassie blue Stained

3)

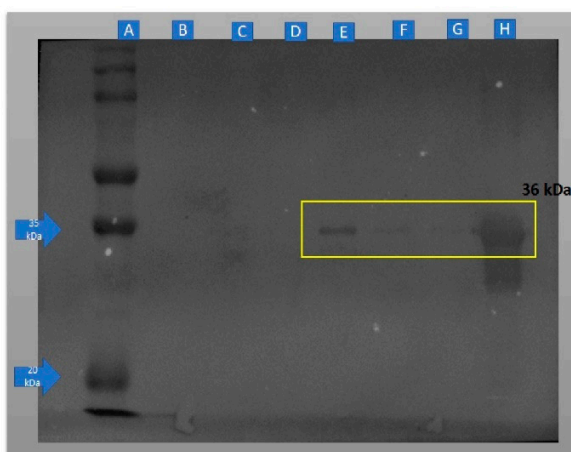

Western Blot for Poly-HIS antibody, Substrate System TMB (3,3',5,5'-Tetramethylbenzidine)

4)

**Supplementary Figure 13 B.** 12% SDS-PAGE, Coomassie stain and Western Blot using Poly-HIS antibody, for different steps of protein formation and isolation from inclusion bodies of *E. coli*(M15), using 0.1 mM IPTG overnight at 37°C. Lane A: Ladder 250 kDa (BioRad 1610374) B: LB broth after IPTG induction C: Empty Lane, D: Bacterial lysate after 10,000 g spin E: Resuspension buffer discard, F: Deoxycholic acid wash discard, G: Final wash discard, and H: Resuspended Protein 36 kDa pellet in ddH<sub>2</sub>O. Western blot, poly-HIS antibody with substrate system 3,3',5,5'-Tetramethylbenzidine (TMB). 1) & 2). Uncropped images. 3) & 4). Cropped Images.

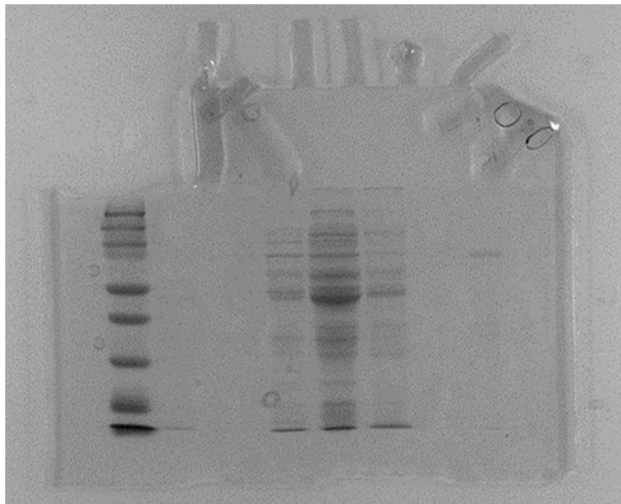

1)

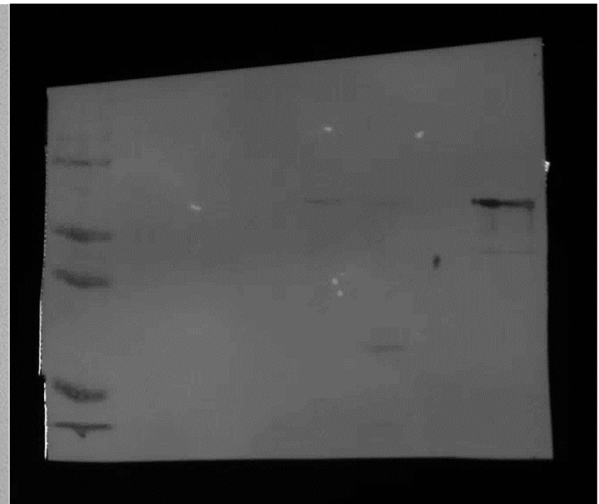

2)

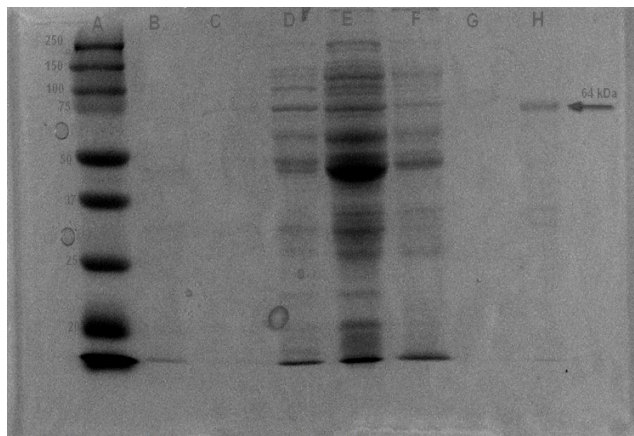

12% SDS-PAGE, Coomassie Blue Stained

3)

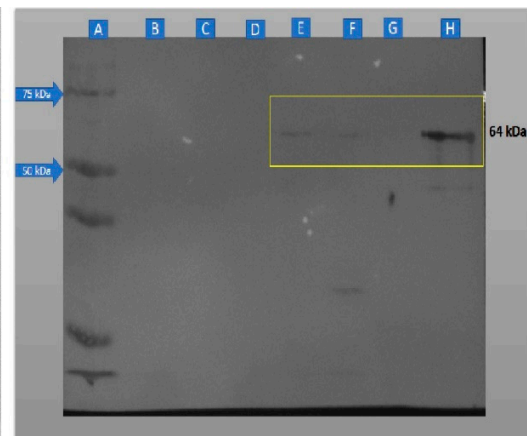

Western Blot for Poly-HIS antibody, Substrate System 3,3',5,5'-Tetramethylbenzidine (TMB)

4)

**Supplementary Figure 13 C.** 12% SDS-PAGE, Coomassie stain for different steps of protein formation and isolation from inclusion bodies of *E. coli*(M15), using 0.1 mM IPTG overnight at 37°C. Lane A: Ladder 250 kDa (BioRad 1610374) B: LB broth after IPTG induction C: Empty Lane, D: Bacterial lysate after 10,000 g spin E: Resuspension buffer discard, F: Deoxycholic acid wash discard, G: Final wash discard, and H: Resuspended Protein 64 kDa pellet in ddH<sub>2</sub>O. Western blot, poly-HIS antibody with substrate system 3,3',5,5'-Tetramethylbenzidine (TMB). 1) & 2). Uncropped images. 3) & 4). Cropped Images.

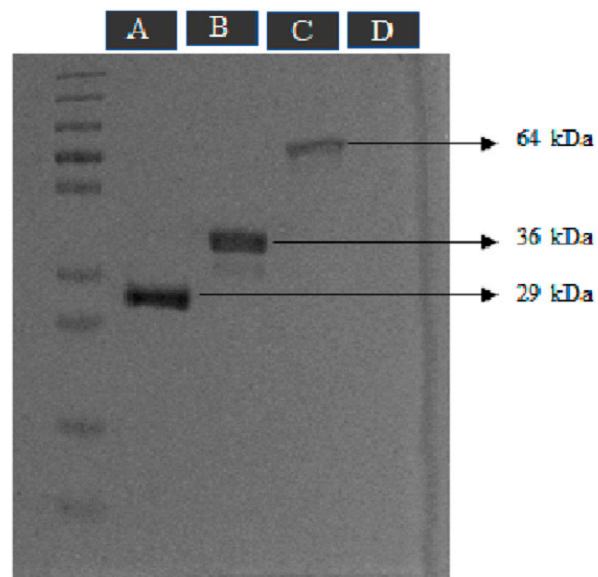

**Supplementary Figure 13 D.** Protein separation on 10% SDS-PAGE Lane A: protein ruler (Page Ruler™ Prestained, Cat. 26617, ThermoFisher, USA), lane B: 29 kDa, lane C: 36 kDa & lane D: 64 kDa.

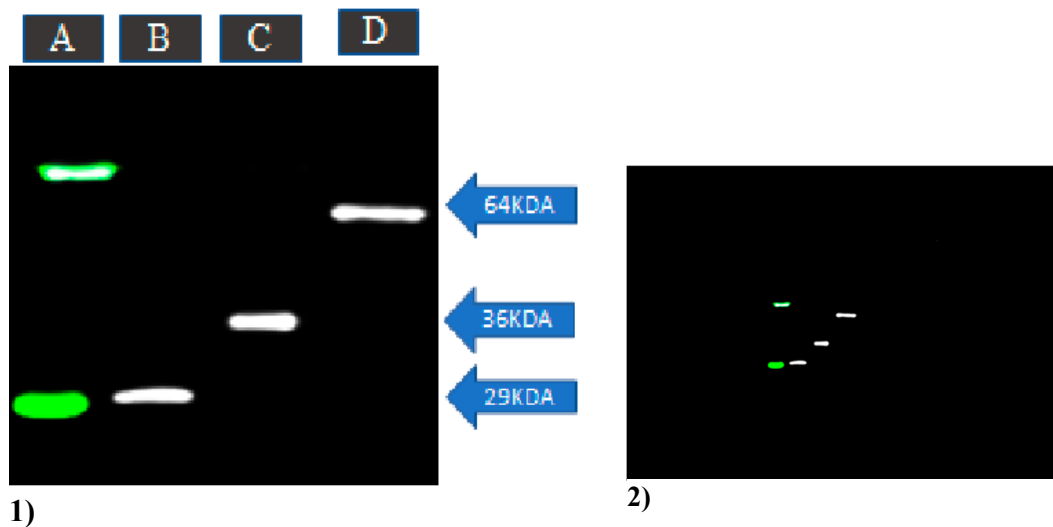

**Supplementary Figure 14.** Western blot analysis of Recombinant Constructs based on Poly-His antibodies. Lane A Protein ruler (#1610374 Bio Rad Precision plus™ USA), lane B 29 kDa construct, lane C 36 kDa construct & lane D 64 kDa construct. Substrate system Clarity™ Western ECL Substrate (#1705060 BioRad). 1) Cropped Image, 2) Uncropped image.

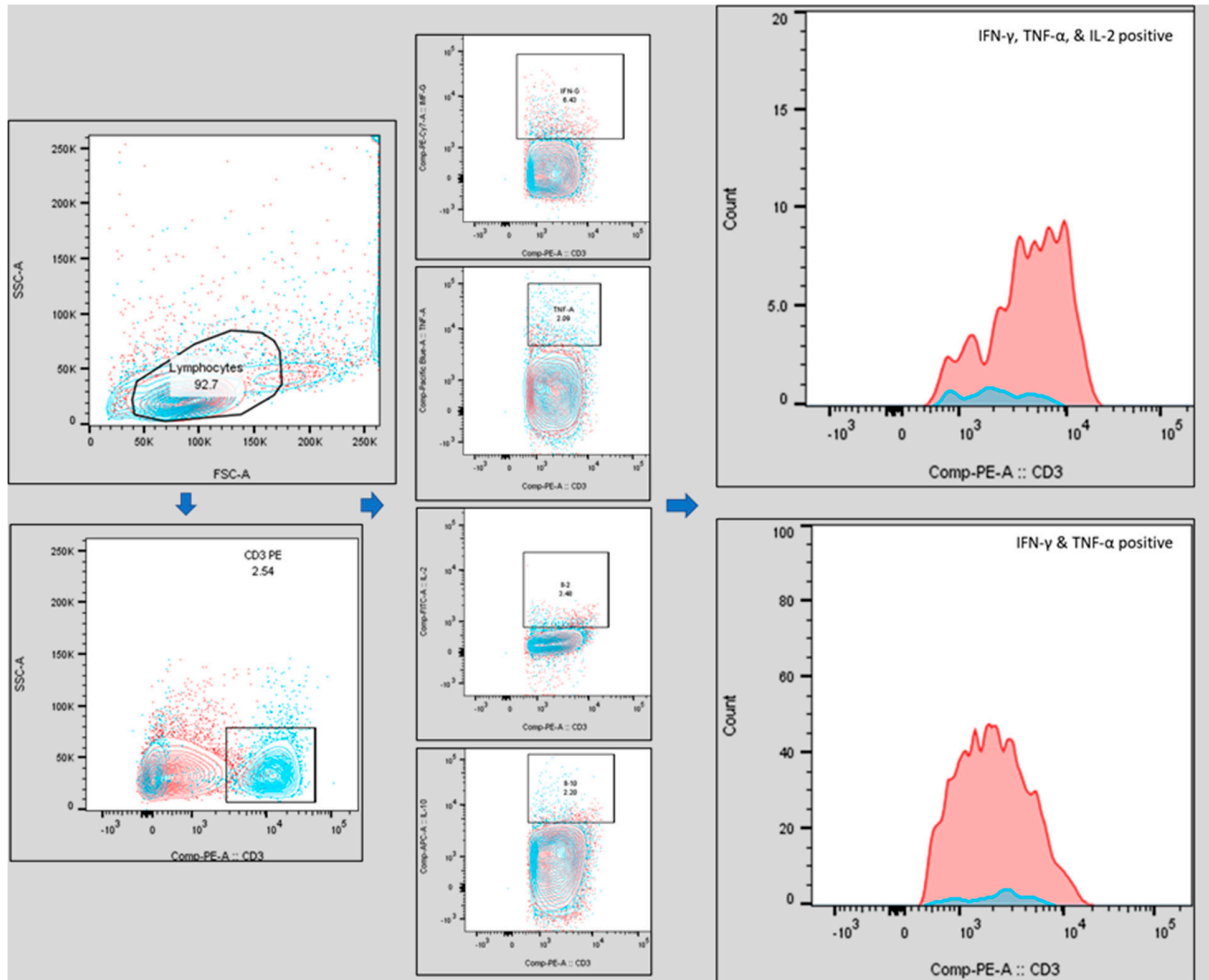

**Supplementary Figure 15.** Gating Strategy For identification of polyfunctional CD3<sup>+</sup> T cells. Blue: Unstimulated Stained cells, Red: Stimulated Stained cells. PBMC gated for Lymphocytes based on FSC and SSC. Lymphocytes gated for CD3<sup>+</sup> T cells based on PE-CD3 antibody. IFN-γ inducing cells gated on the basis of PE-cy-7, for TNF-α Pacific-Blue, for IL-2 FITC and for IL-10 APC. Negative gates set on the basis of stained unstimulated samples. Triple positive and dual positive cells identified on the basis of Boolean gating. Data analysis done using FlowJo™ V.10 (BD Bioscience US).

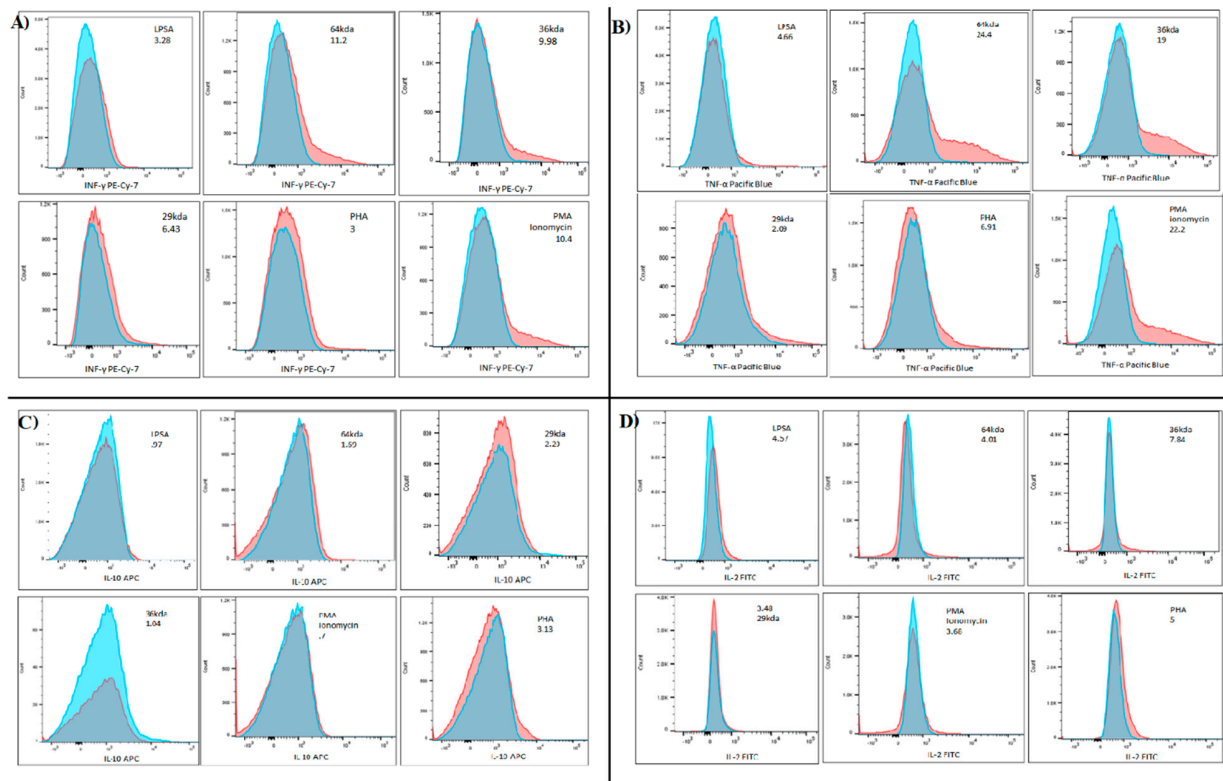

**Supplementary Figure 16.** Histogram analysis of IFN- $\gamma$ , B: TNF- $\alpha$ , C: IL-2 & D: IL-10 secreting CD3<sup>+</sup> T cells. A) Frequency of IFN- $\gamma$  secretory cells, B) Frequency of TNF- $\alpha$  secretory cells, C) Frequency of IL-2 secretory cells, & D) Frequency of IL-10 secretory cells. Red, stimulated stained cells. Blue, unstimulated stained cells. LPSA (Leishmania Promastigote Soluble Antigen), 64 kDa construct, 36 kDa construct, 29 kDa construct, Phorbol myristate acetate (PMA) 100ng/ml with Ionomycin (50ng/ml), Phytohemagglutinin (PHA) 10 $\mu$ g/ml.

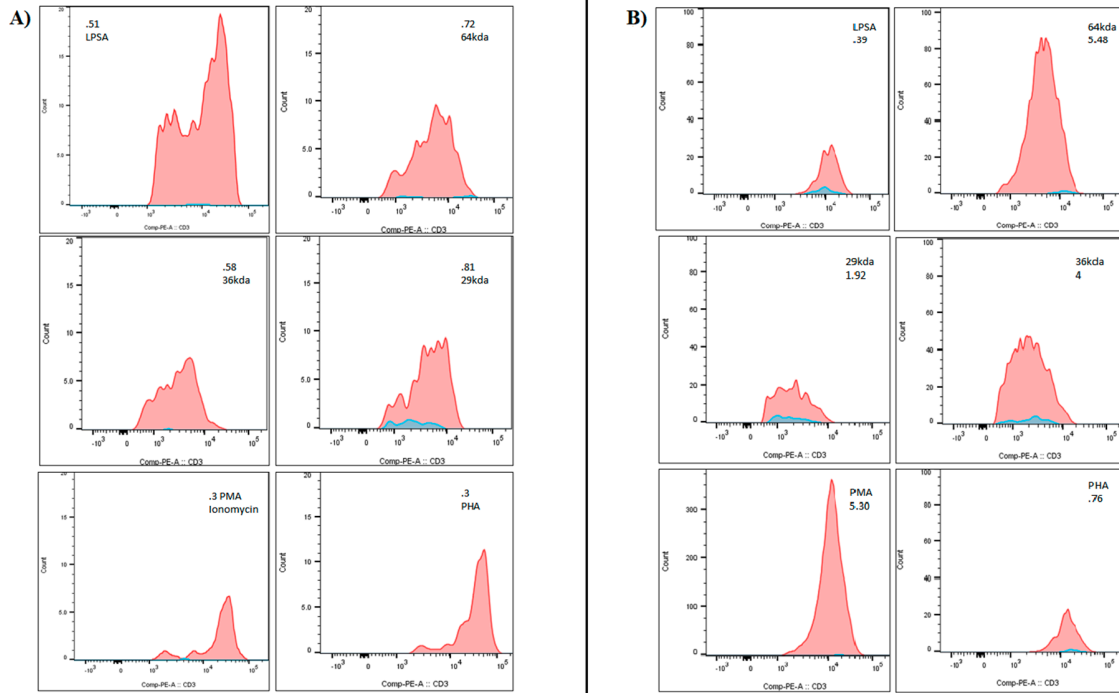

**Supplementary Figure 17.** Histogram analysis of **A)** simultaneous INF- $\gamma$ , TNF- $\alpha$ , and IL-2 producing CD3<sup>+</sup> T cells (Polyfunctional T cells) & **B)** IFN- $\gamma$  and TNF- $\alpha$  producing double positive cells. Red, stimulated stained cells. Blue, unstimulated stained cells. Polyfunctional T cells percentage stimulation by, LPSA (*Leishmania* Promastigote Soluble Antigen), 64 kDa construct, 36 kDa construct, 29 kDa construct, Phorbol myristate acetate (PMA) 100ng/ml along with Ionomycin (50ng/ml), Phytohemagglutinin (PHA) 10 $\mu$ g/ml.

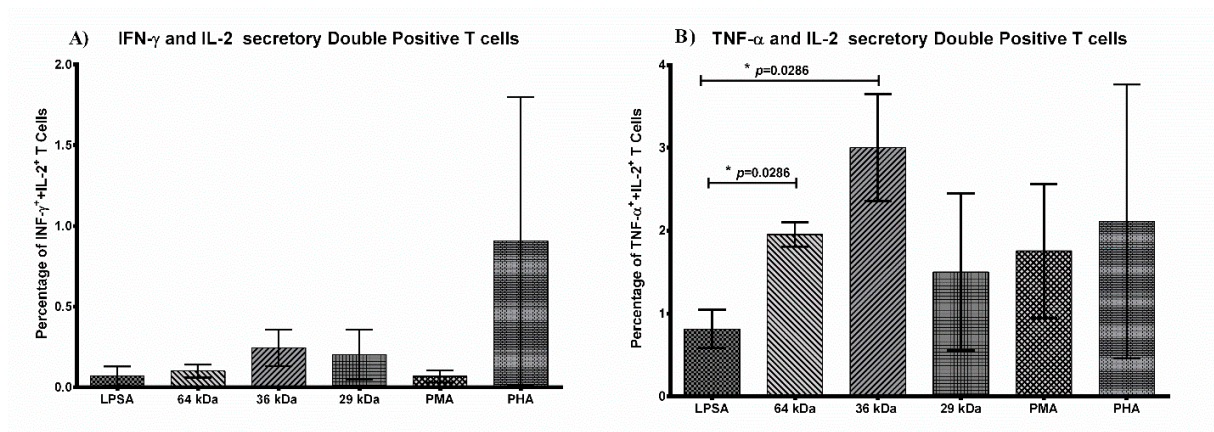

**Supplementary Figure 18.** Bar-graph analysis of double positive CD3 $^{+}$  T cells **A)** simultaneous IFN- $\gamma$  and IL-2 producing double positive cells CD3 $^{+}$  T cells and **B)** TNF- $\alpha$  and IL-2 producing double positive cells CD3 $^{+}$  T cells. Mean  $\pm$ SD. Significance level determined by Student's t-test, \* $p < 0.05$  compared to LPSA treated group, ns  $p > 0.05$ , \*  $p \leq 0.05$ .

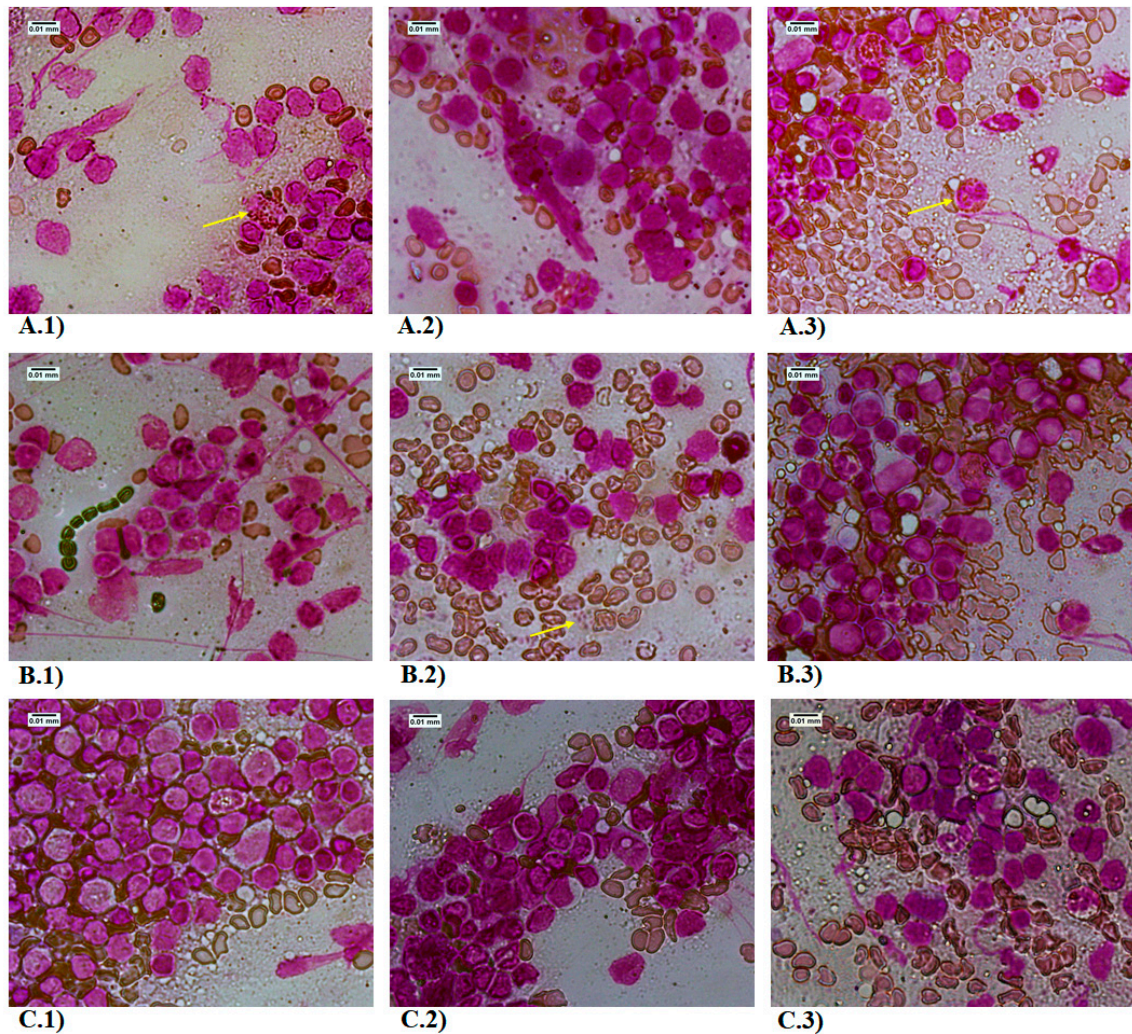

**Supplementary Figure 19A.** Giemsa-stained touch impressions of spleen from different animal groups. **A.1-3)** Unimmunized Infected animal, **B.1-3)** Complete Freund's adjuvant (CFA) only, & **C.1-3)** healthy animal. Arrows indicating the infected cells. *Magnification 10×100X* (oil immersion) (Olympus, Tokyo, Japan). **Supplementary Figure 19B.** Giemsa-stained touch impressions of spleen from different animal groups. **A.1-3)** 29 kDa immunized animal, **B.1-3)** 36 kDa immunized animal, & **C.1-3)** 64 kDa immunized animal. Arrows indicating the infected cells. *Magnification 10×100X* (oil immersion) (Olympus, Tokyo, Japan).

(A)

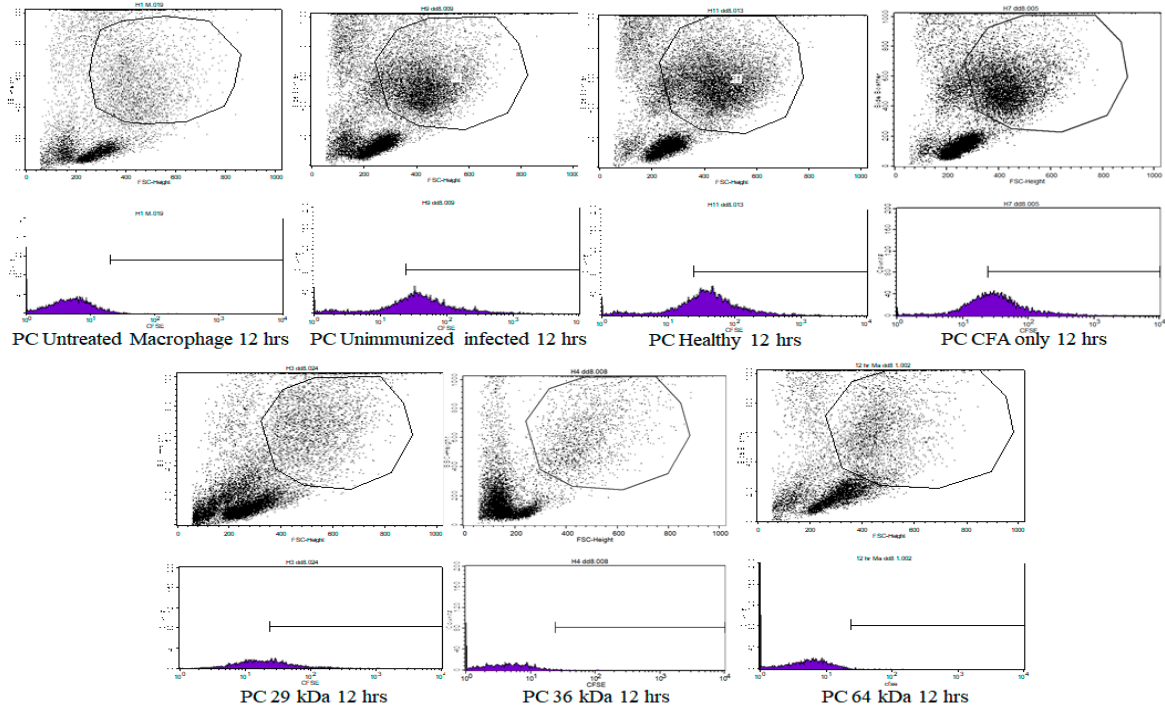

(B)

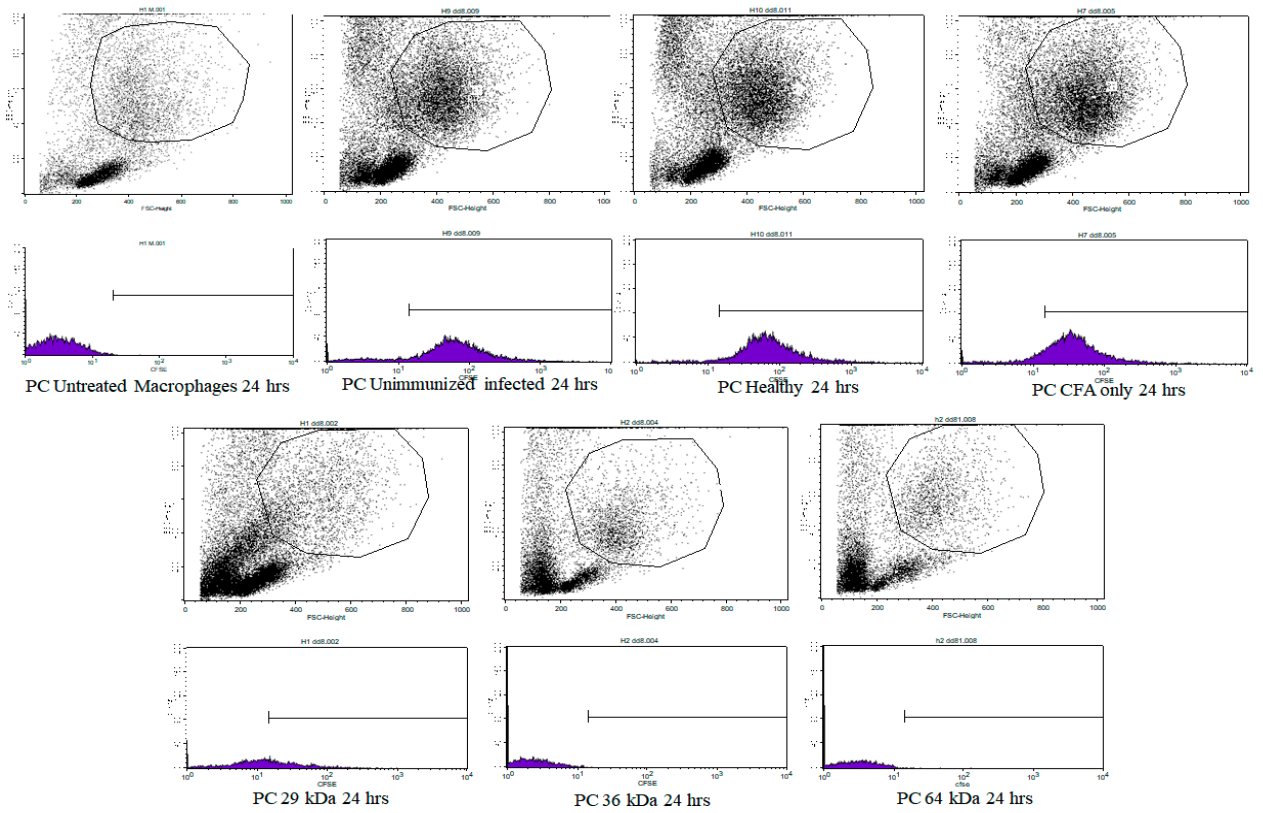

(C)

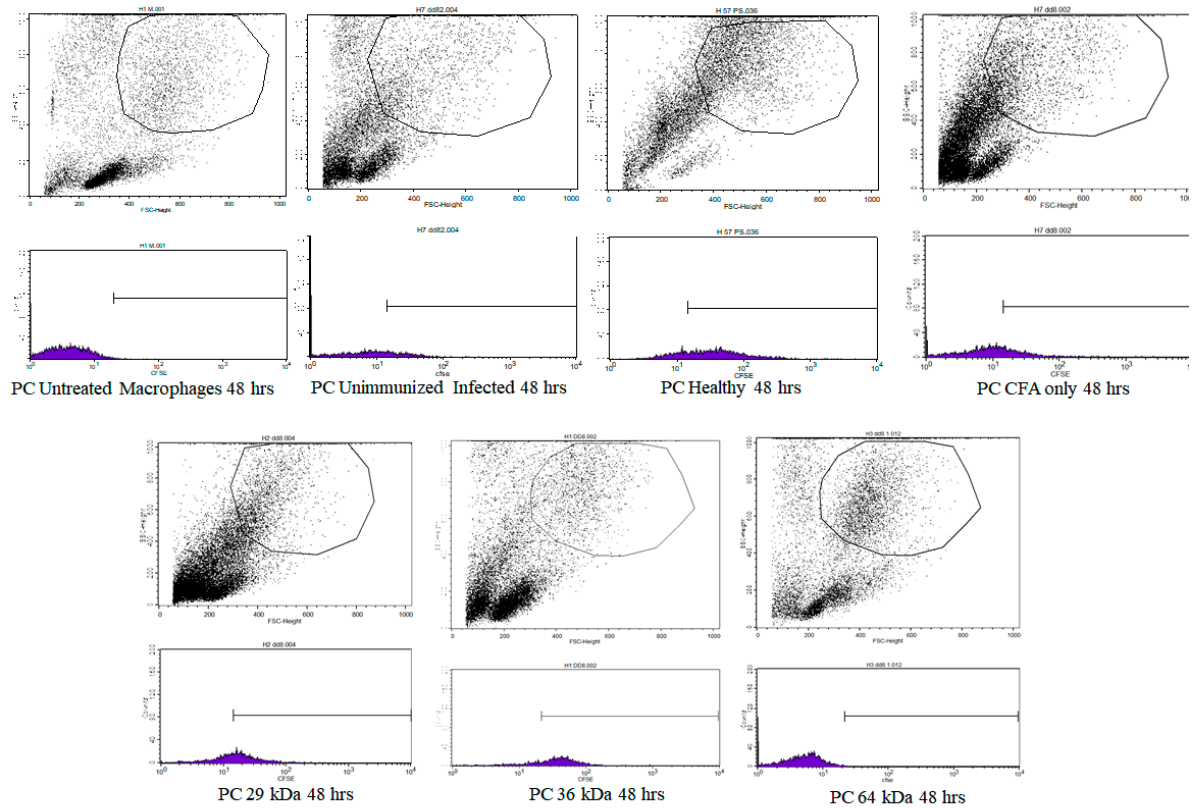

(D)

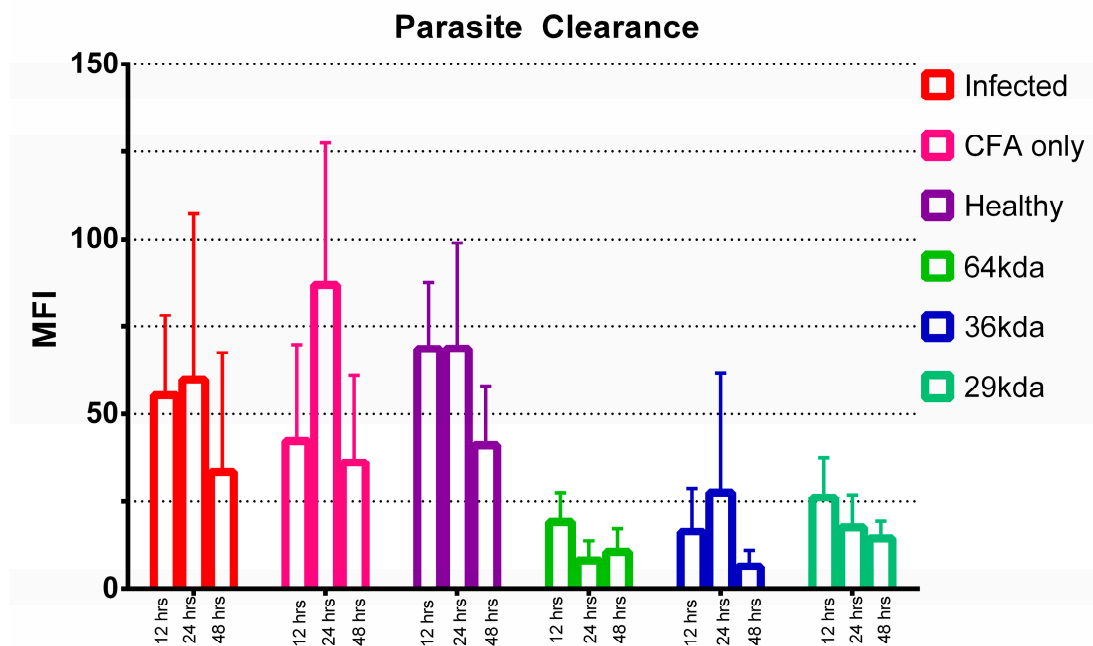

**Supplementary Figure 20.** Representative image for flowcytometry analysis of CFSE signal from adherent peritoneal cells infected with CFSE stained *Leishmania donovani*. Scatter Plot based gating strategy for Polymorphonuclear cells based on FSC and SSC pattern. Histogram for CFSE signal from adherent peritoneal cells from, unimmunized animal, healthy animal, CFA only animal, 29 kDa immunized animal, 36 kDa immunized animal, and 64 kDa immunized animal, **20A)** Parasite clearance level at 12 hrs, **20 B)** Parasite Clearance level at 24 hrs, **20 C)** Parasite Clearance level at 48 hrs. **20 D)** Parasite clearance at different time for all groups, Mean values  $\pm$ SD.

**(A)**

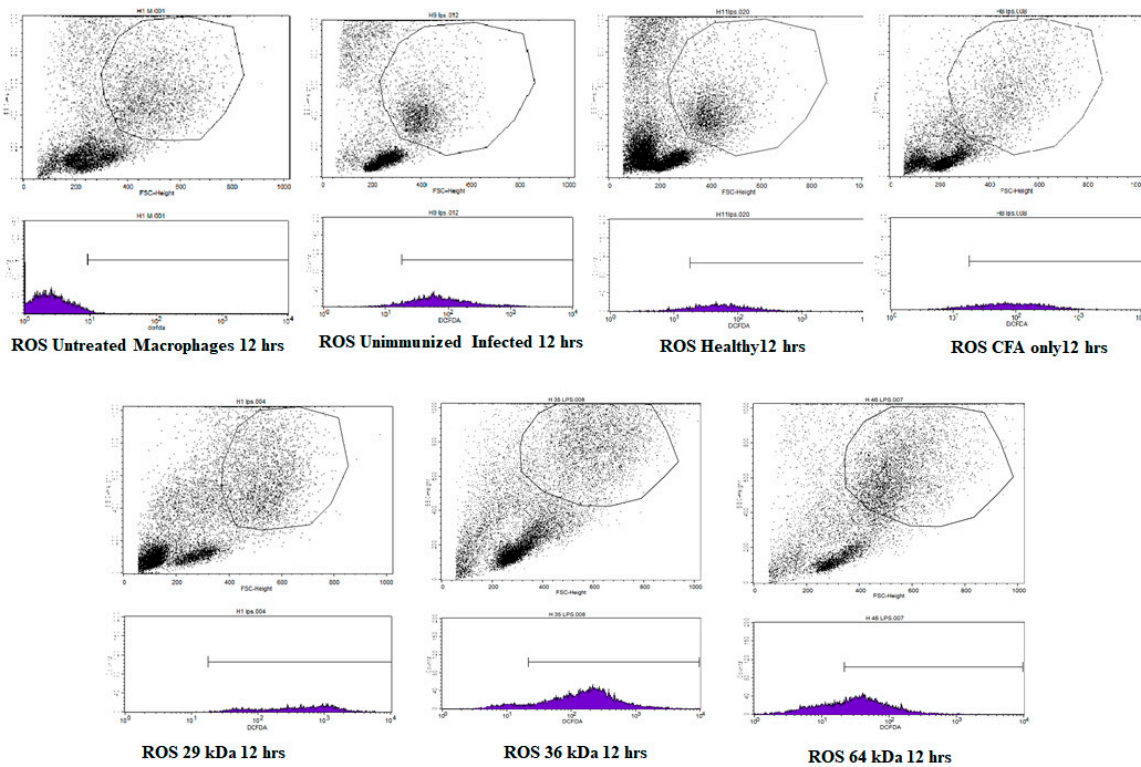

(B)

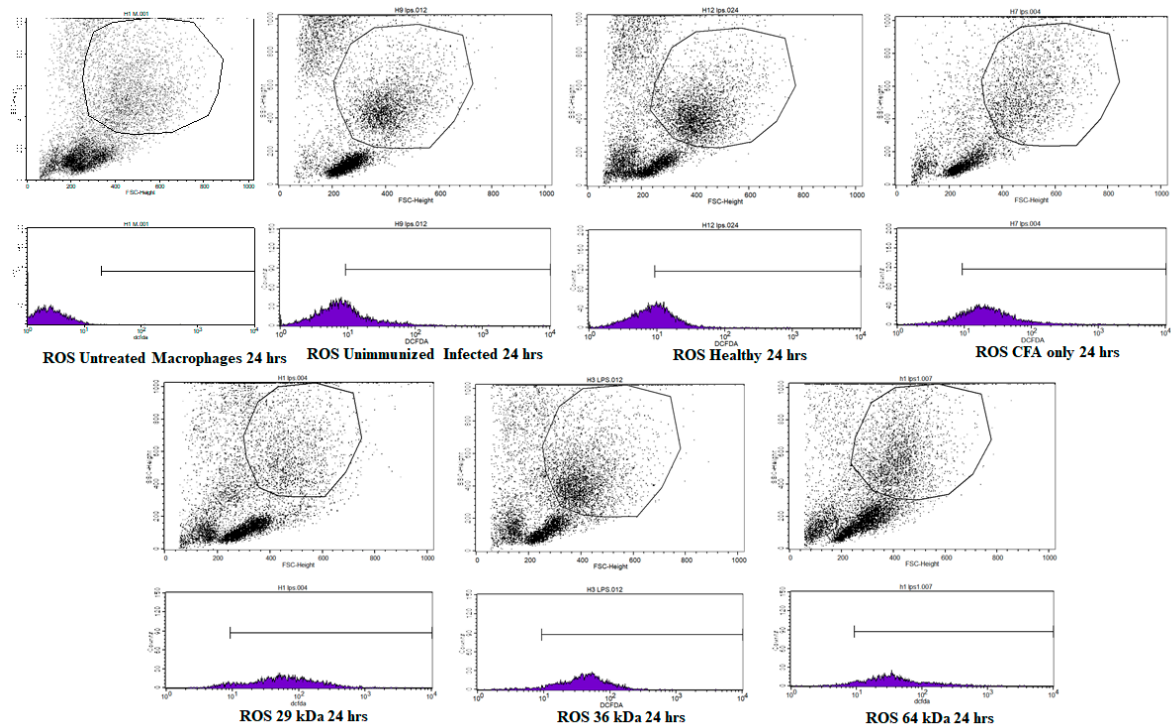

**Supplementary Figure 21.** Representative image for flowcytometry analysis for 2,7-dichlorofluorecein levels from peritoneal adherent cells of different animal groups. Scatter Plot based gating strategy for Polymorphonuclear cells based on FSC and SSC pattern. Histogram of 2',7'-dichlorofluorescein (DCF) intensity and number of cells, unimmunized infected animal, healthy animal, CFA alone animal, 29 kDa immunized animal, 36 kDa immunized animal, and 64 kDa immunized animal, **21A)** ROS production level at 12 hrs, and **21 B)** ROS production level at 24 hrs.

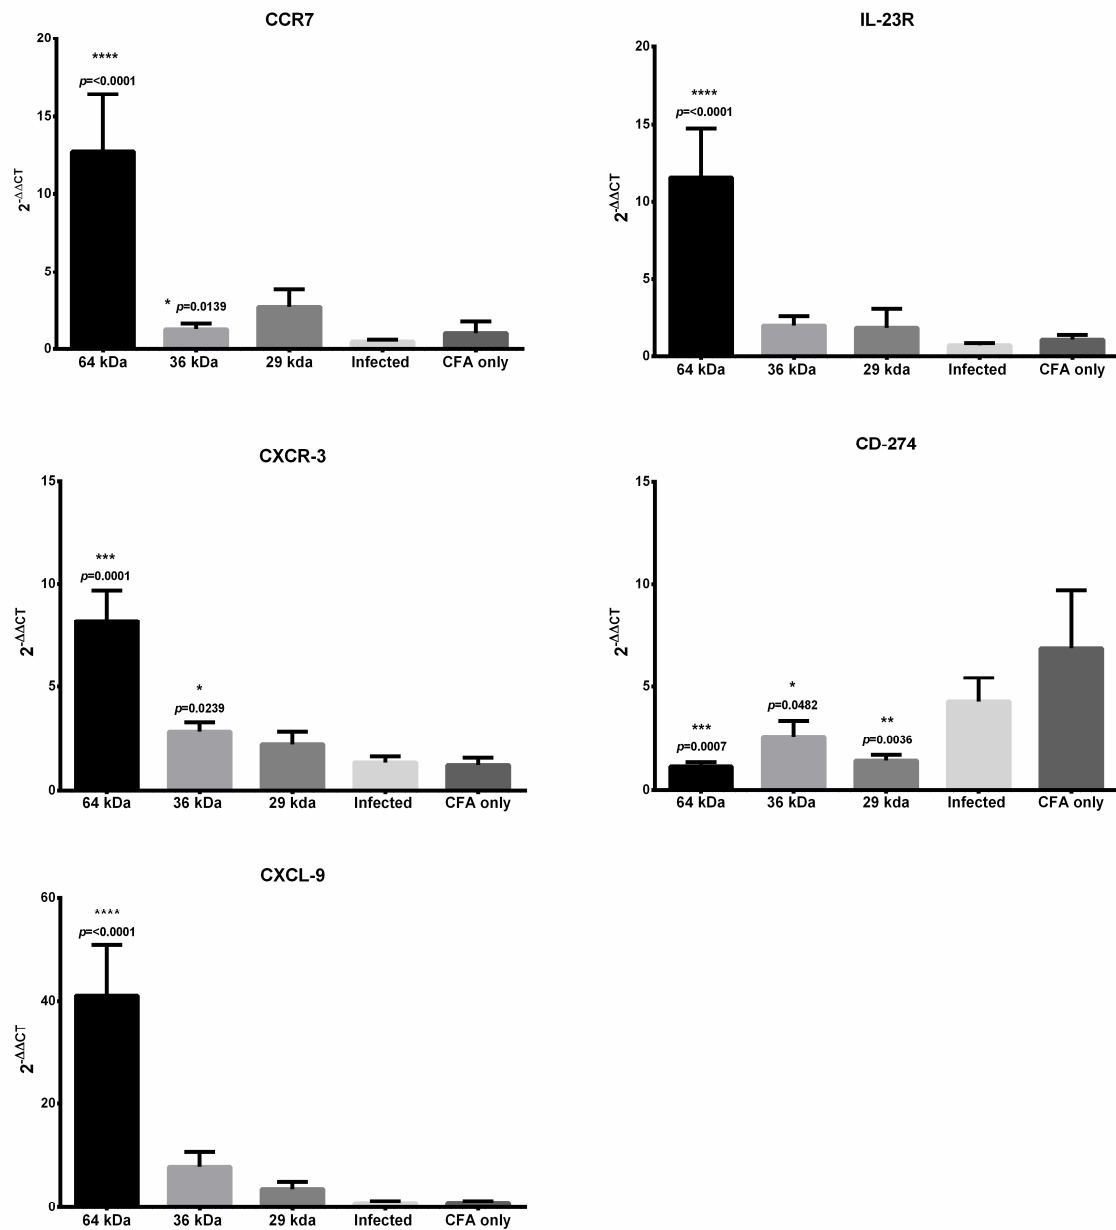

**Supplementary Figure 22.** Relative fold change in gene expression levels of CCR7, IL-23r, CXCR-3, CD-274 & CXCL-9 from immunized and unimmunized animals. Statistics: Student t-test. Comparison between test group and infected. Level of significances ns  $p > 0.05$ , \* $p \leq 0.05$ , \*\* $p \leq 0.01$ , \*\*\* $p \leq 0.001$ , \*\*\*\* $p \leq 0.0001$ .

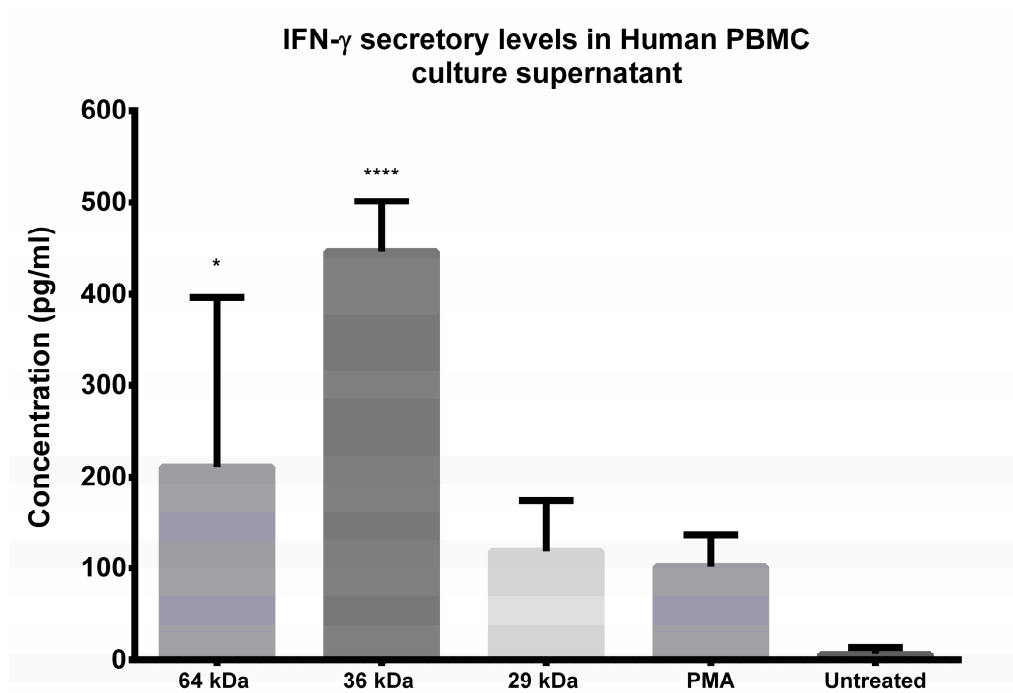

**Supplementary Figure 23.** IFN- $\gamma$  levels as measured from the culture supernatant of human PBMC's stimulated with vaccine candidate proteins. Detection method ELISA. Difference statistically significant as determined by ANOVA ( $p < 0.05$ ). (Level of significance, ns  $p > 0.05$ , \*  $p \leq 0.05$ , \*\*\*\*  $p \leq 0.0001$ ).

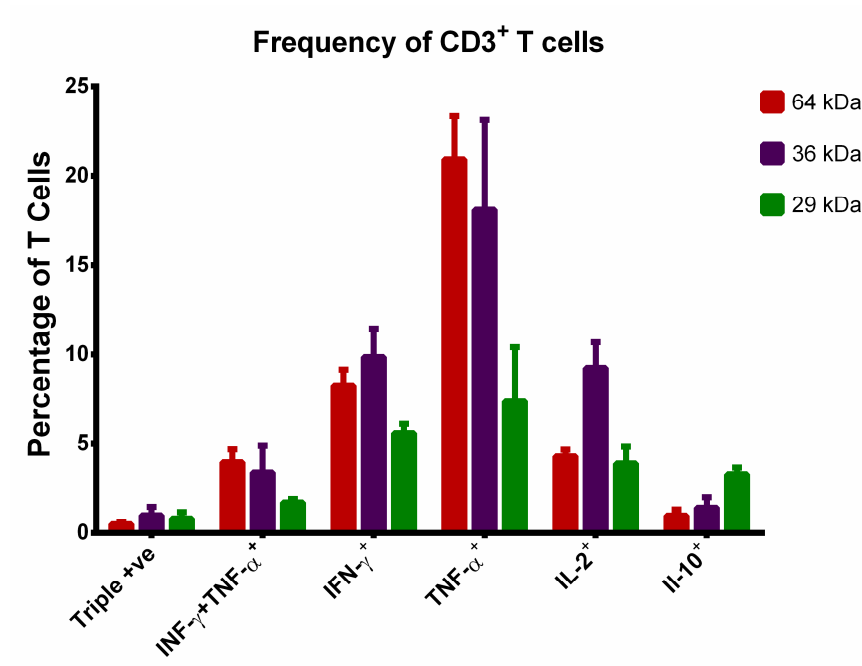

**Supplementary Figure 24.** Frequency of T cells positive for polyfunctionality and cytokine secretion when induced with the three proteins.
